# Supplementary material
Source: PubMed Central journal article supplement (PMC2945424)

# Antiproliferative Compounds from *Pongamiopsis pervilleana*

## from the Madagascar Dry Forest

Liva Harinantenaina, Peggy J. Brodie, Carla Slebodnick, Martin W. Callmander, Etienne Rakotobe, Sennen Randrianasolo, Richard Randrianaivo, Vincent E. Rasamison, Karen TenDyke, Yongchun Shen, Edward M. Suh, and David G. I. Kingston

### SUPPORTING INFORMATION

#### 1. Structures and numbering of all compounds

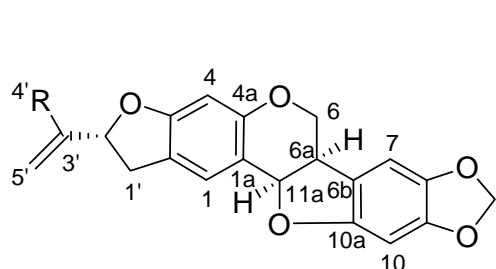

1 R = CH<sub>2</sub>OH: 4'-hydroxy-emoroidocarpan

2 R = CH<sub>3</sub>: Emoroidocarpan

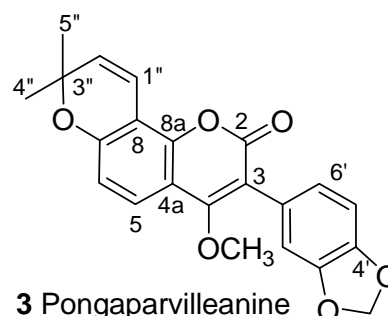

3 Pongaparvilleanine

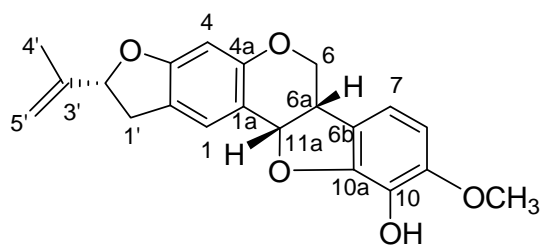

4 Epipervilleine

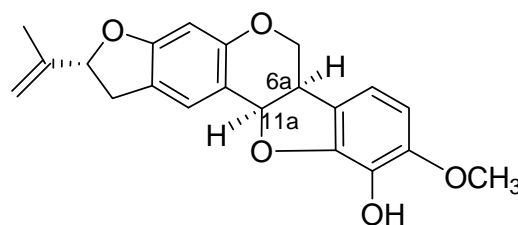

6 Pervilleine

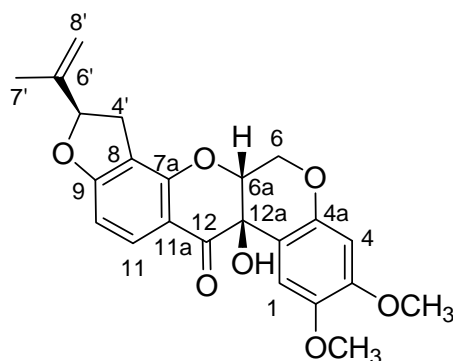

5 Rotenolone

The numbering system for rotenolone is that of Malgahaes, A. F.; Tozzi A. G. M. A.; Sales, N. L. H. B.; Malgahaes G. E. *Phytochemistry*, **1996**, *42*, 1459-1471.

## 2. Characterization data for rotenolone (5)

Amorphous powder,  $[\alpha]_D$ : -172 (*c*, 0.1, MeOH). CD (*c* 1.5, MeOH)  $[\theta]_{330}$  -25,950; UV (MeOH)  $\lambda_{\max}$  nm (log  $\epsilon$ ): 293 (2.8), 245 (4.1);  $^1\text{H}$  NMR (500 MHz, in  $\text{CD}_3\text{OD}$ ,  $\delta$  in ppm):  $^1\text{H}$ -NMR (500 MHz, in  $\text{CD}_3\text{OD}$ ,  $\delta$  in ppm): 7.78 (1H, d,  $J$ = 8.5 Hz, H-11), 6.68 (1H, s, H-1), 6.52 (1H, s, H-4), 6.518 (1H, d,  $J$ = 8.5 Hz, H-10), 5.29 (1H, t,  $J$ = 8.8 Hz, H-2'), 5.04 (1H, brs, H-5'), 4.62 (3H, m, H-6a), 4.56 (1H, *dd*,  $J$  = 12.2, 2.5 Hz, H-6 $\alpha$ ), 4.47 (1H, *dd*, 12.2, 1.1 Hz, H-6 $\beta$ ), 3.29 (overlapped with the solvent signal, H-1' $\alpha$ ), 2.92 (1H, *dd*,  $J$ = 16.0, 9.0 Hz, H-1' $\beta$ ), 1.74 (3H, s, H-4'), 3.66, 3.78 (2 x 3H, 2 s, 2-OMe, 3-OMe).  $^{13}\text{C}$  NMR (125 MHz, in  $\text{CD}_3\text{OD}$ ,  $\delta$  in ppm): 192.8 (C-12), 169.0 (C-9), 158.7 (C-7a), 153.0 (C-3), 150.4 (C-4a), 144.9 (C-2 and C-6'), 130.8 (C-11), 114.0 (C-8), 112.7 (C-11a), 112.6 (C-7'), 108.0 (C-1a), 105.8 (C-10), 89.3 (C-5'), 77.6 (C-6a), 68.0 (C-12a), 64.9 (C-6), 57.1 (OMe), 56.3 (OMe), 32.0 (C-4'), 17.0 (C-8'). Positive HRESIMS:  $m/z$  433.1269  $[\text{M}+\text{Na}]^+$  (calcd for  $\text{C}_{23}\text{H}_{22}\text{O}_7\text{Na}$ , 433.1263).

## 3. NMR spectra of compounds.

a)  $^1\text{H}$  and  $^{13}\text{C}$  NMR spectra of compounds 1–5

b) HMBC spectra of compounds 1, 3 and 4.

6.38, 6.29, 5.88, 5.88, 5.86, 5.86, 5.47, 5.46, 5.33, 5.31, 5.30, 5.21, 5.21, 4.88, 4.24, 4.23, 4.22, 4.21, 4.15, 3.57, 3.54, 3.32, 3.31, 3.31, 3.31, 3.31, 3.30, 3.08, 3.06, 3.05, 1.20

# <sup>1</sup>H-NMR (in CD<sub>3</sub>OD)

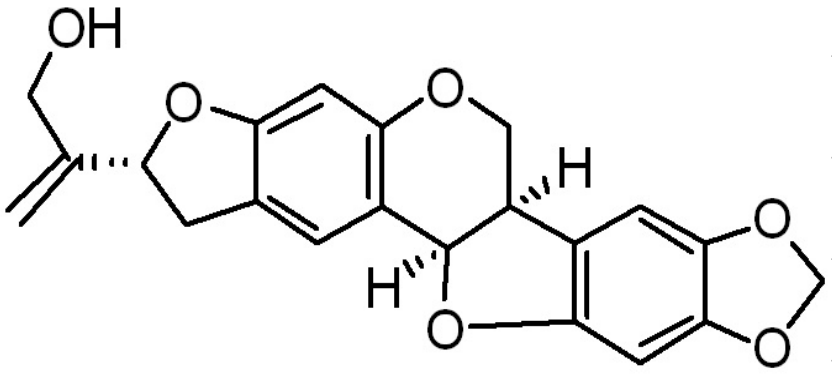

Compound 1: 4'-hydroxy-emoroidocarpan

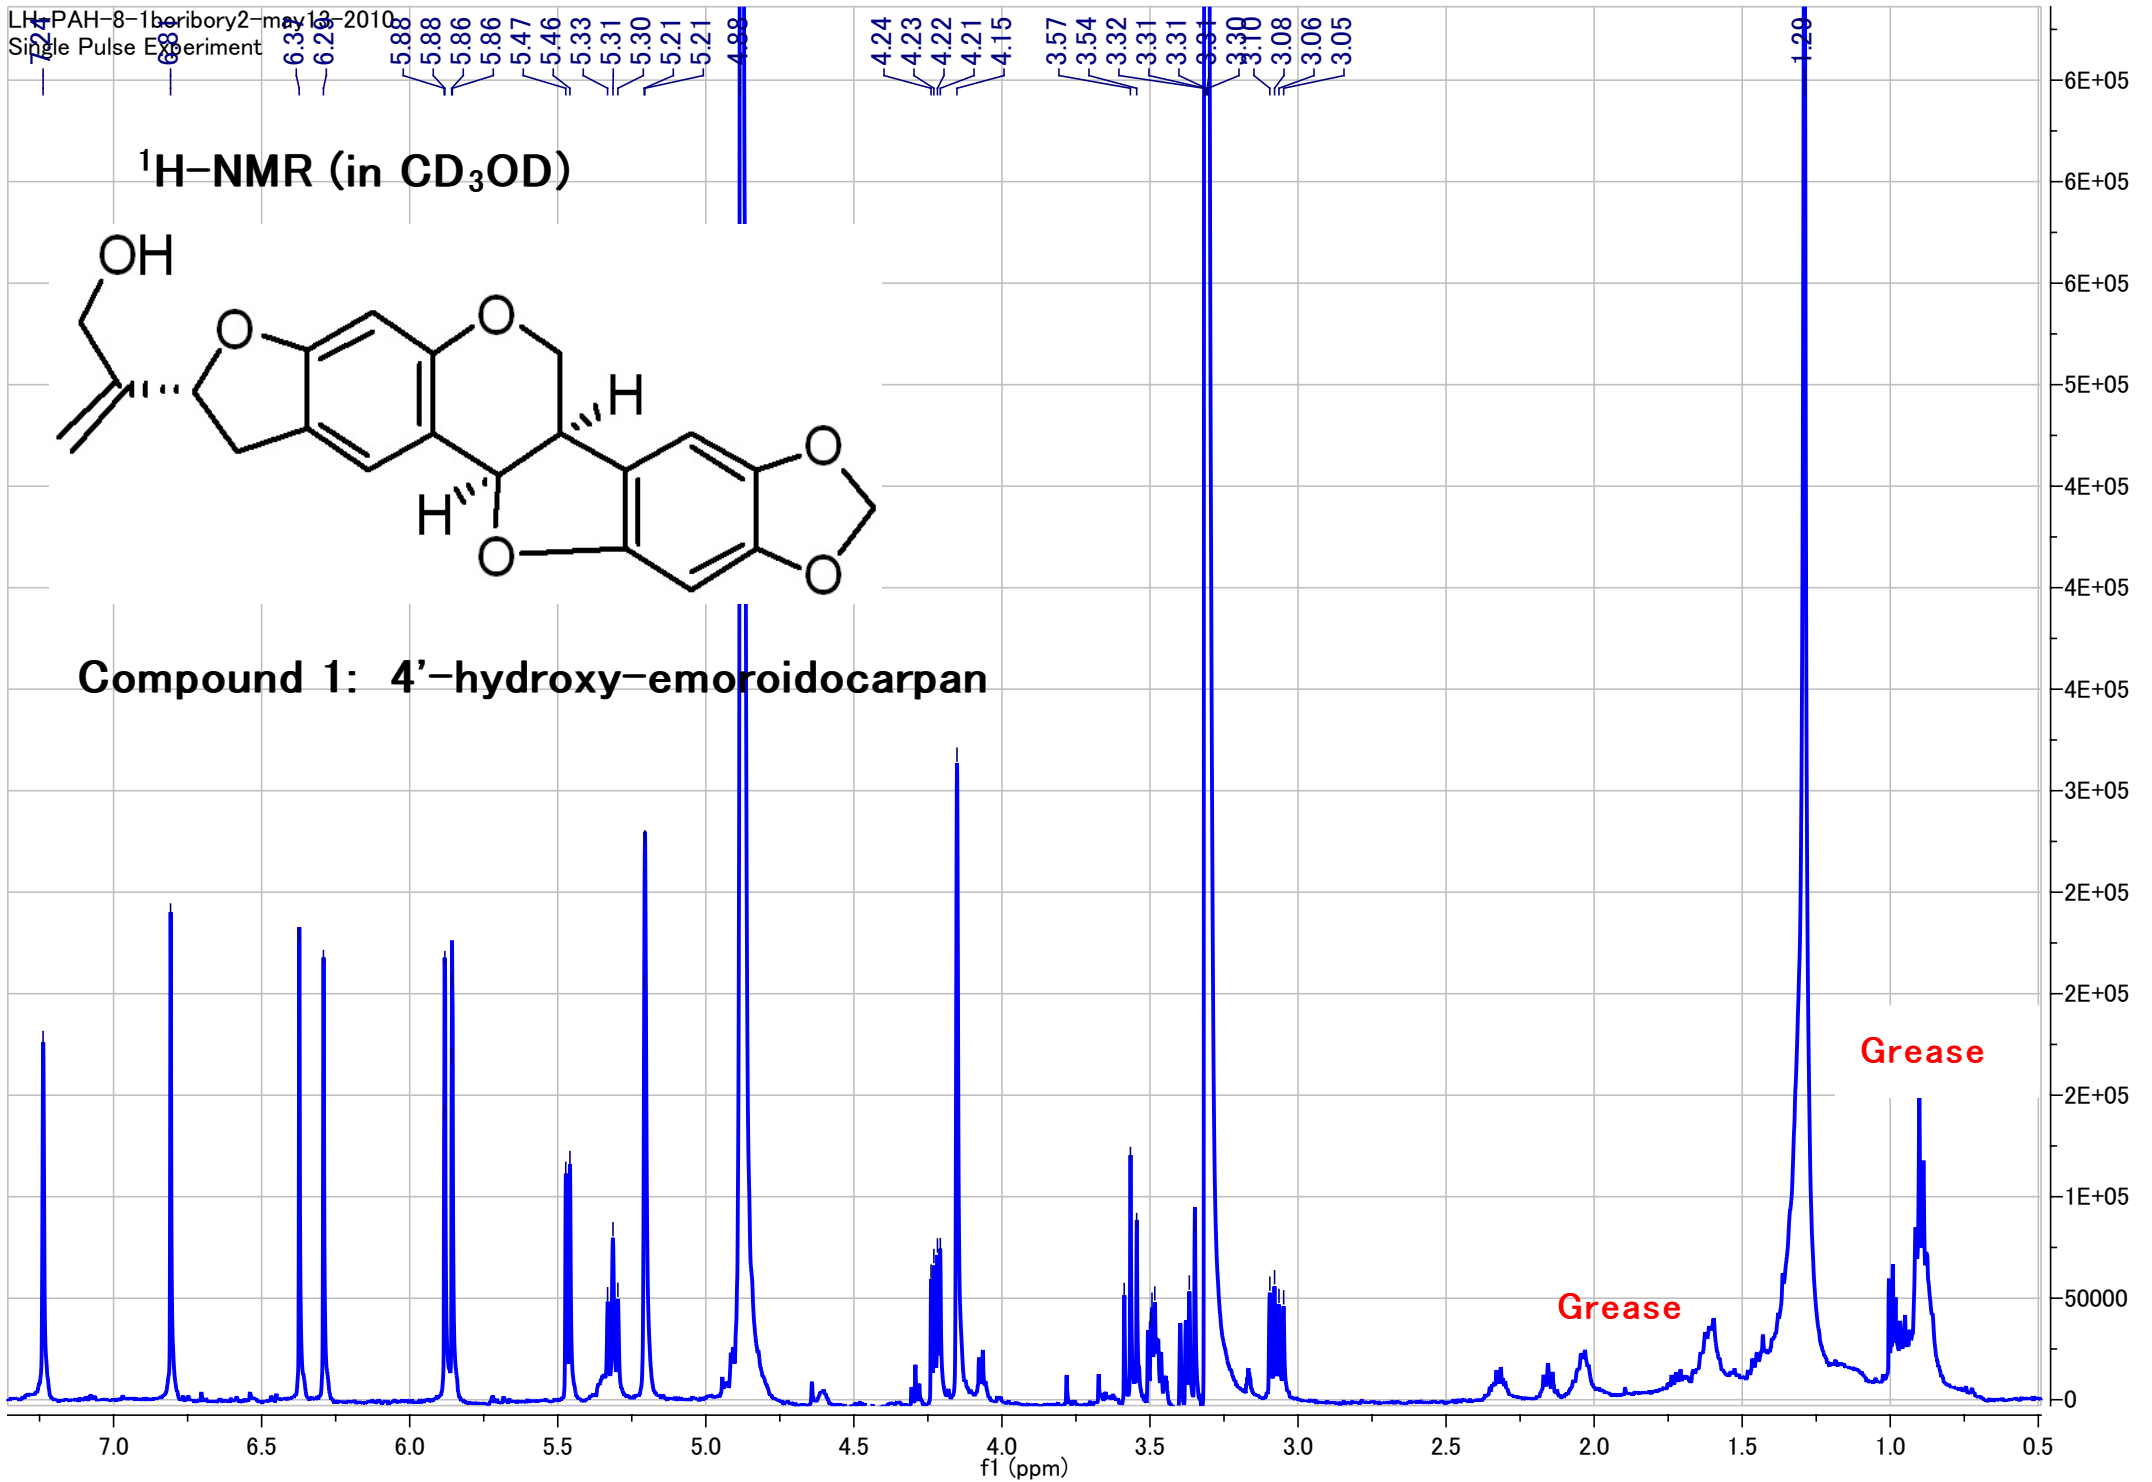

<sup>13</sup>C-NMR (CD<sub>3</sub>OD)

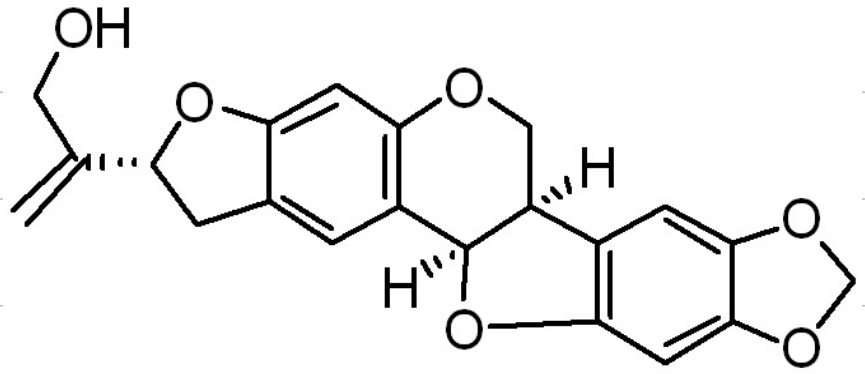

Compound 1: 4'-hydroxy-emoroidocarpan

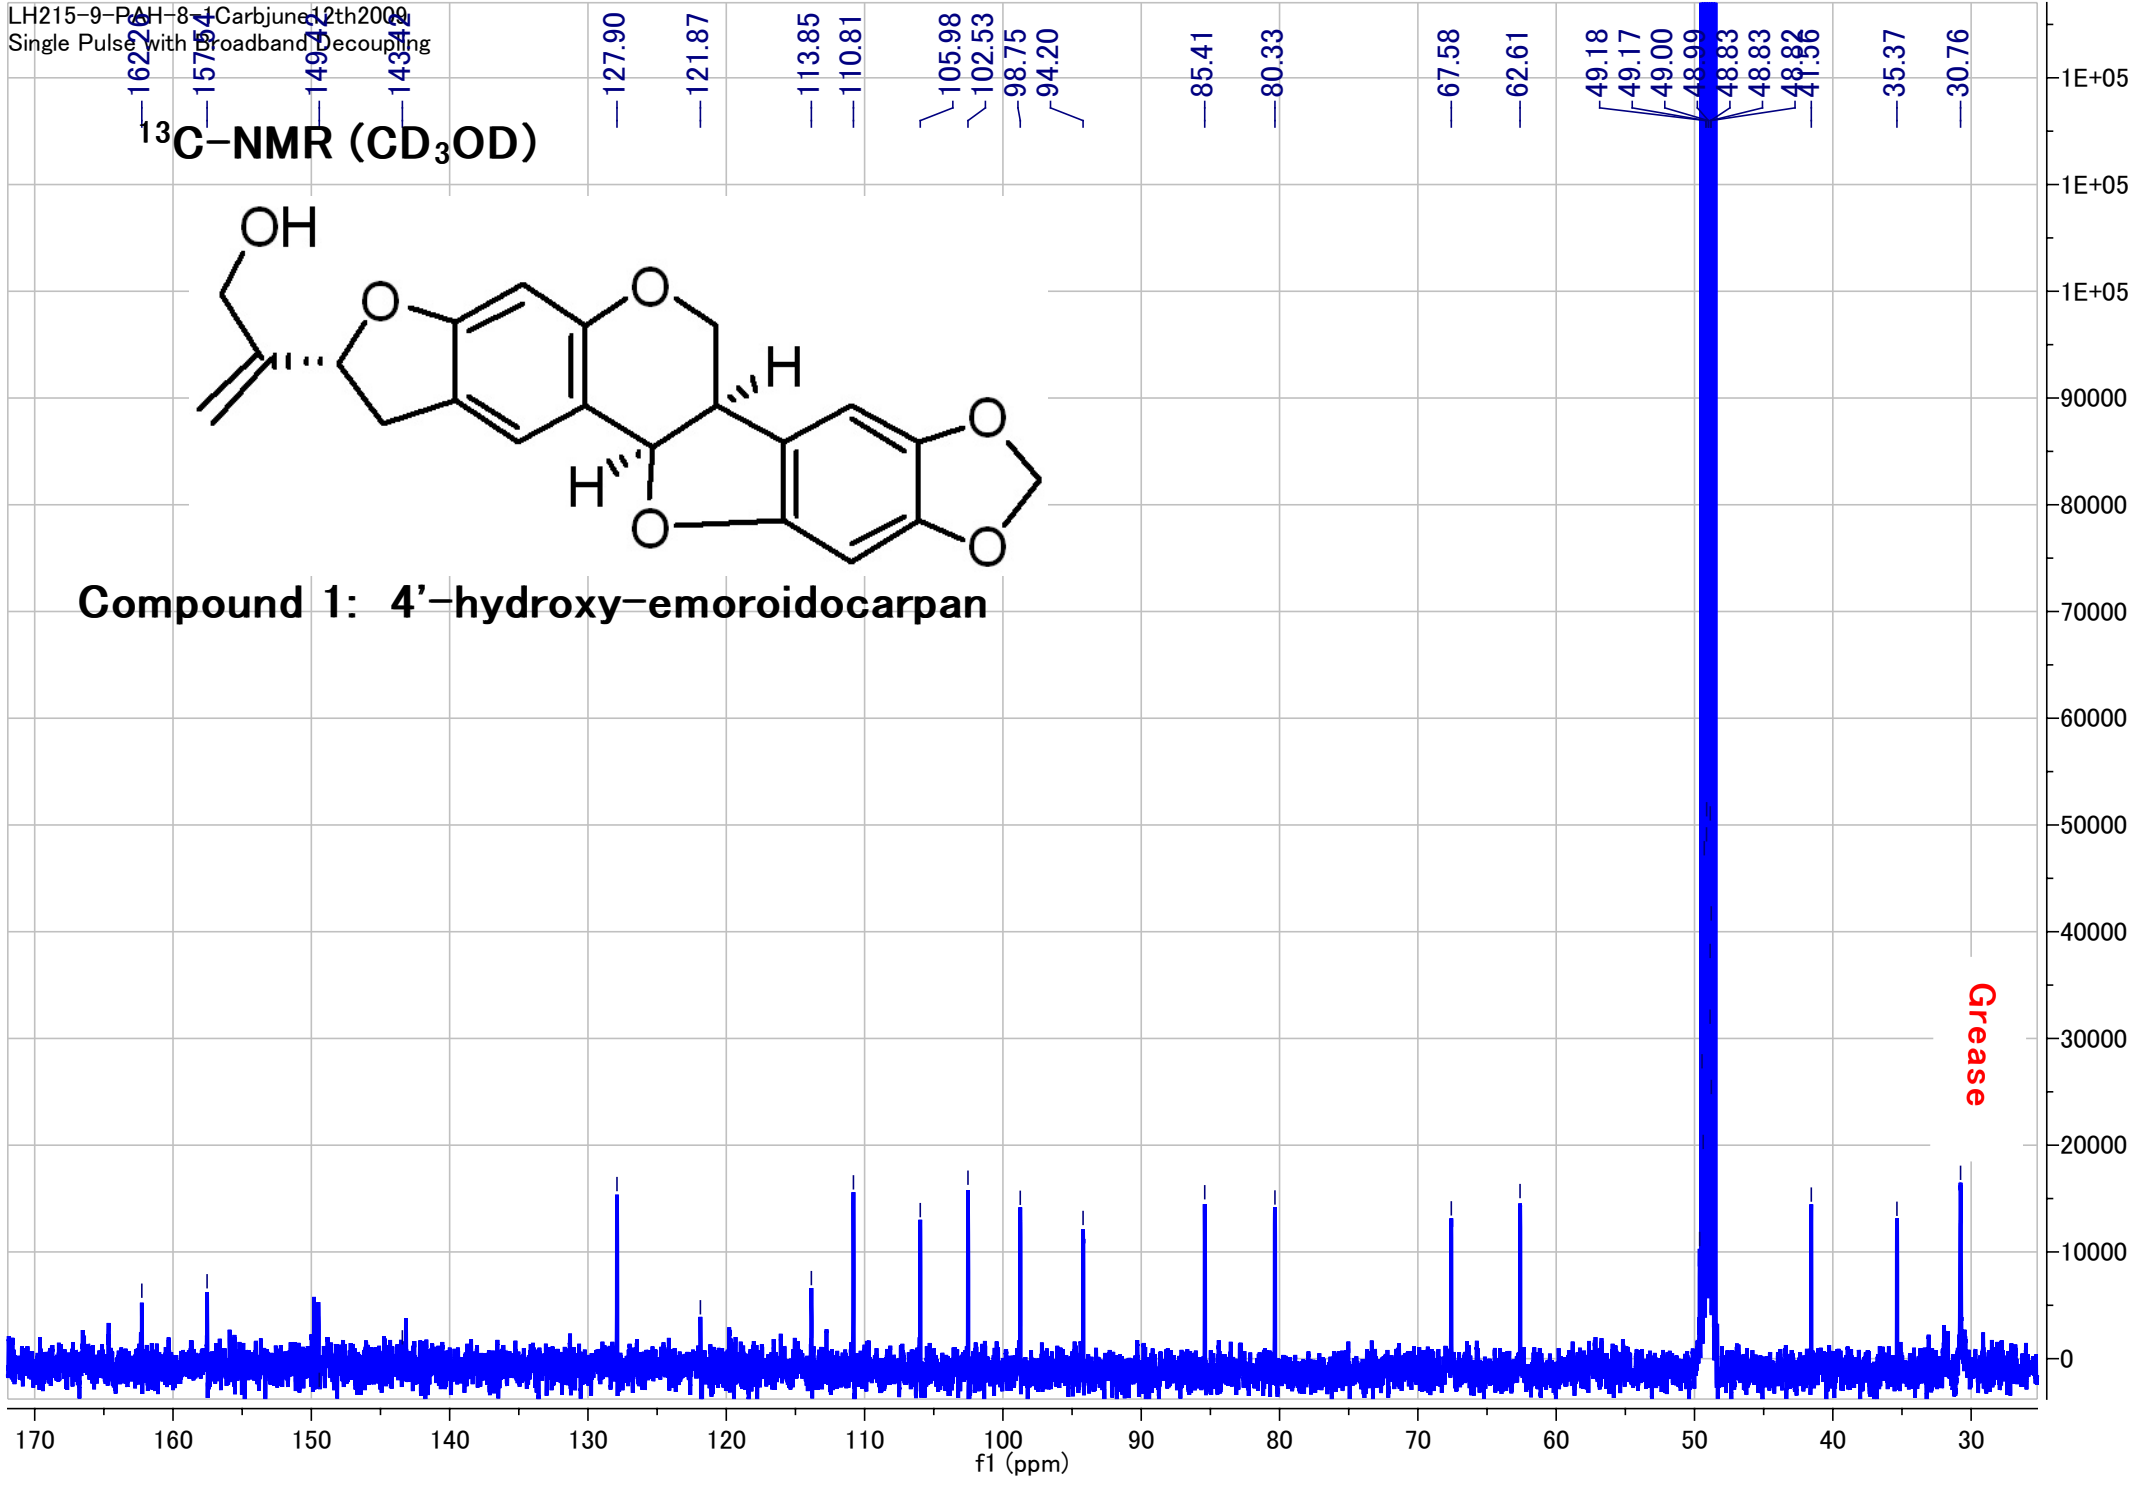

Grease

LH215-9-PAH15p  
Single Pulse Experiment

# <sup>1</sup>H-NMR (in CD<sub>3</sub>OD)

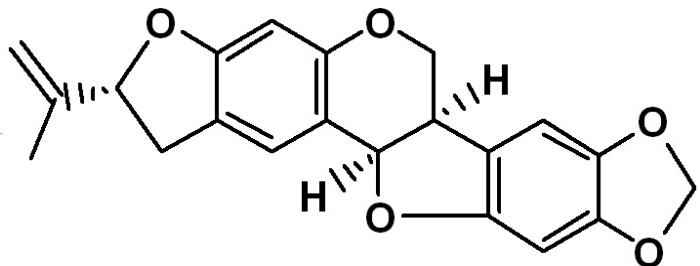

## Compound 2: Emoroidocarpan

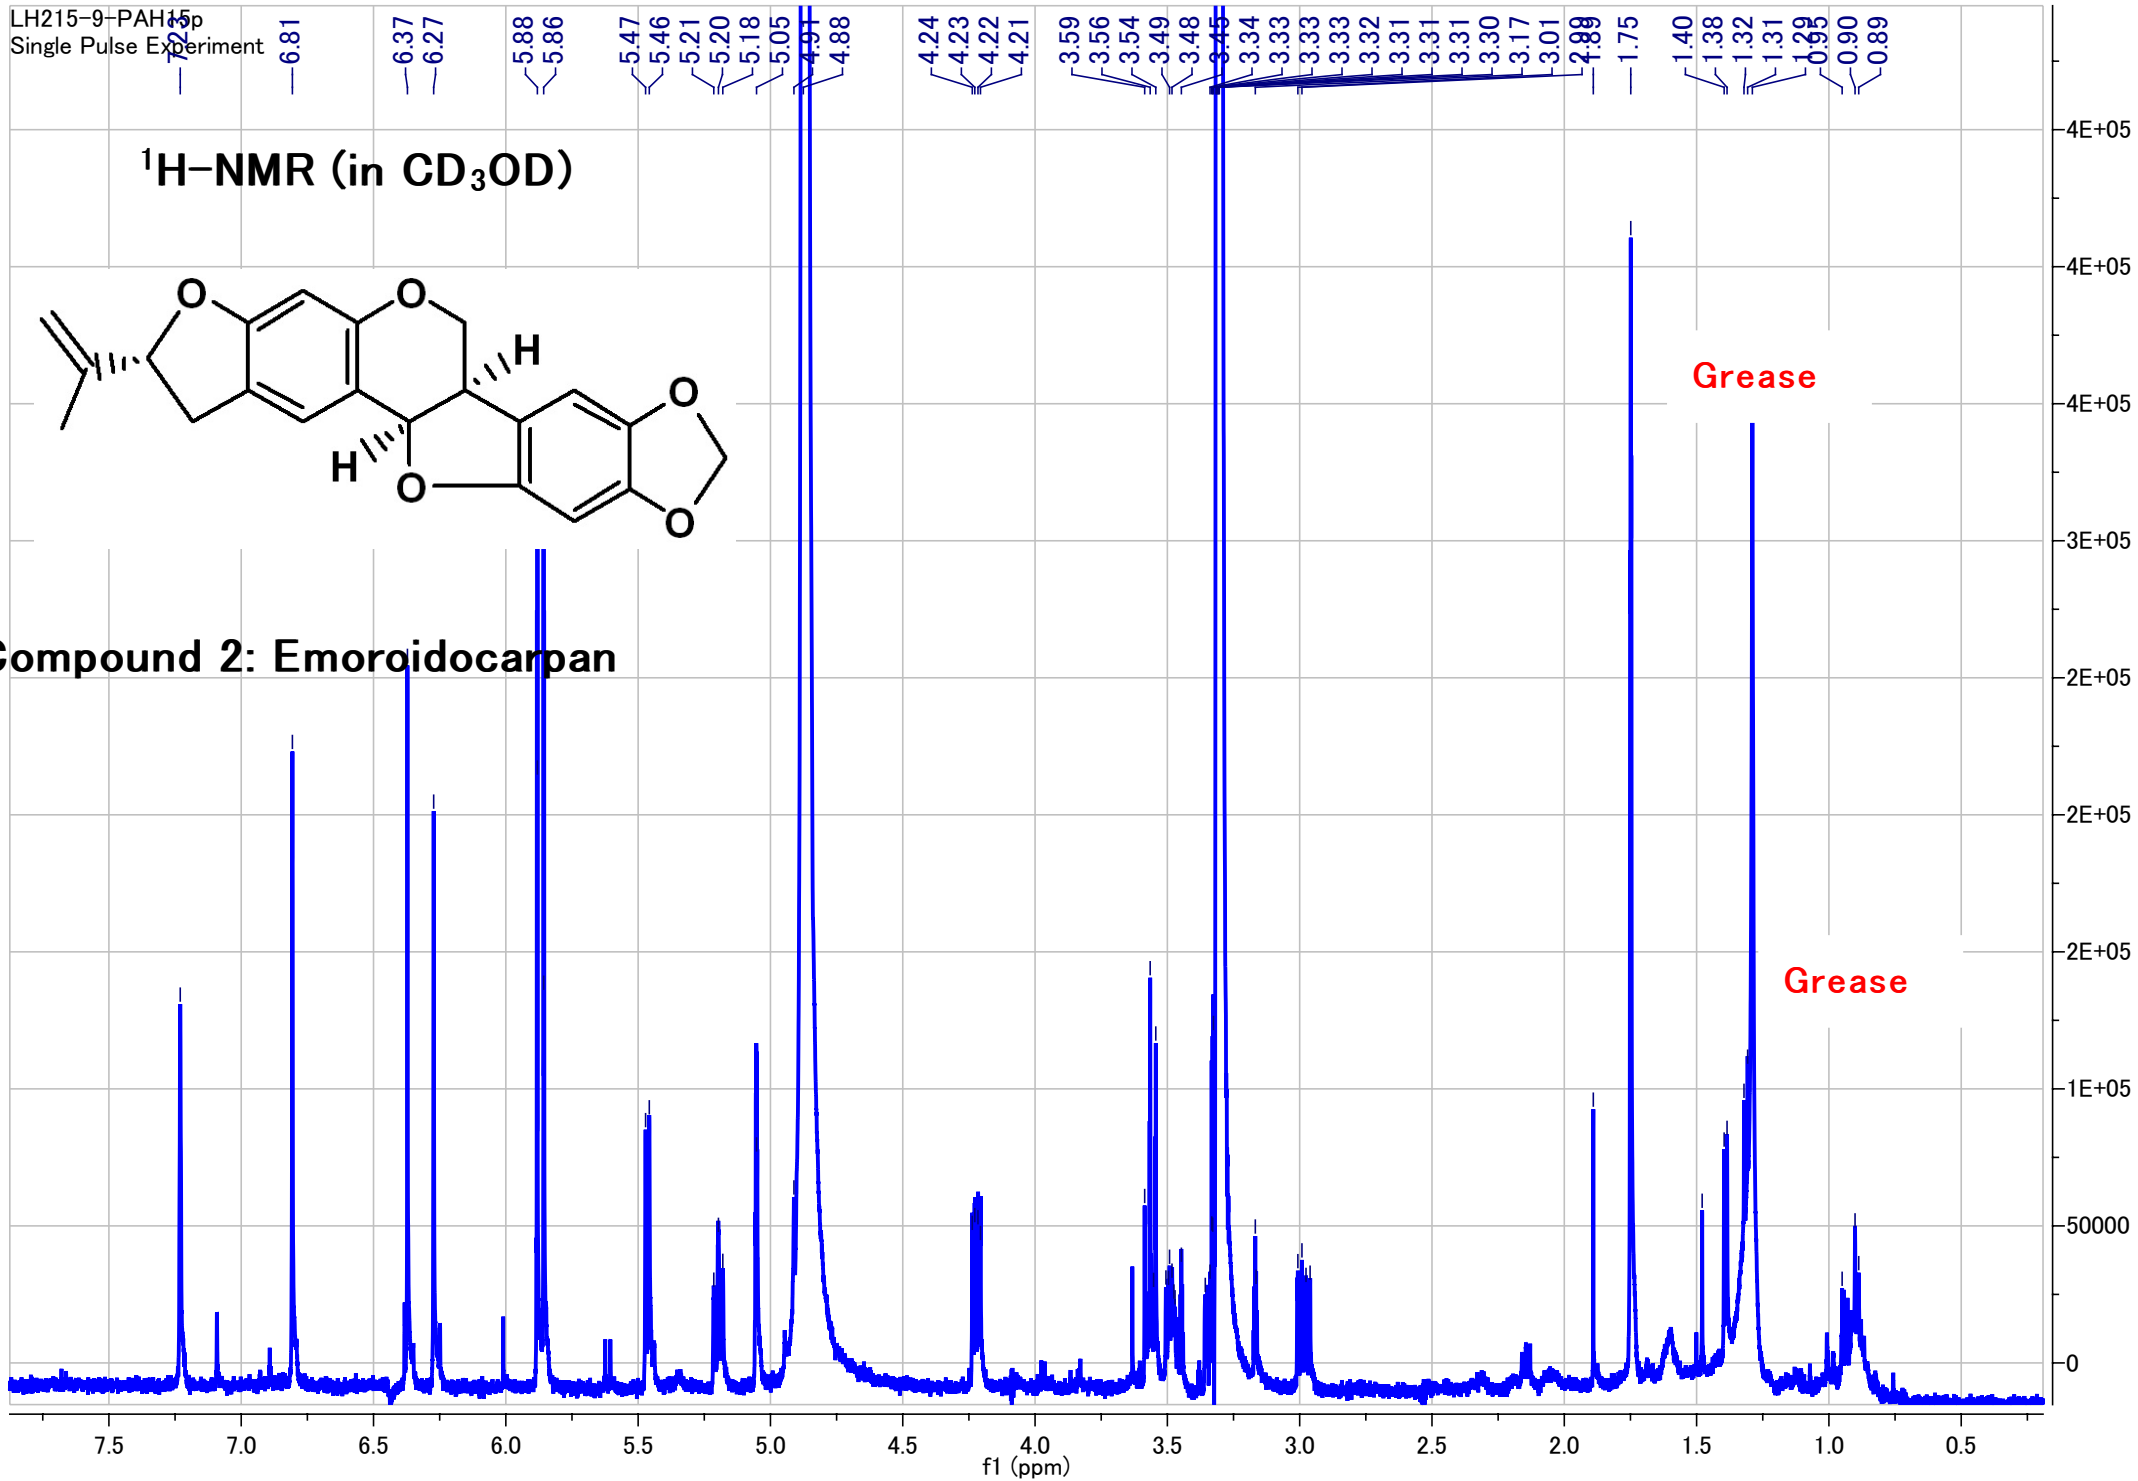

LH215-9-PAH-15carbJune5th  
Single Pulse with Broadband Decoupling

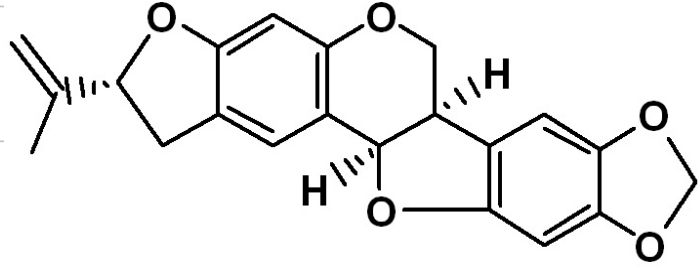

Compound 2: Emoroidocarpan

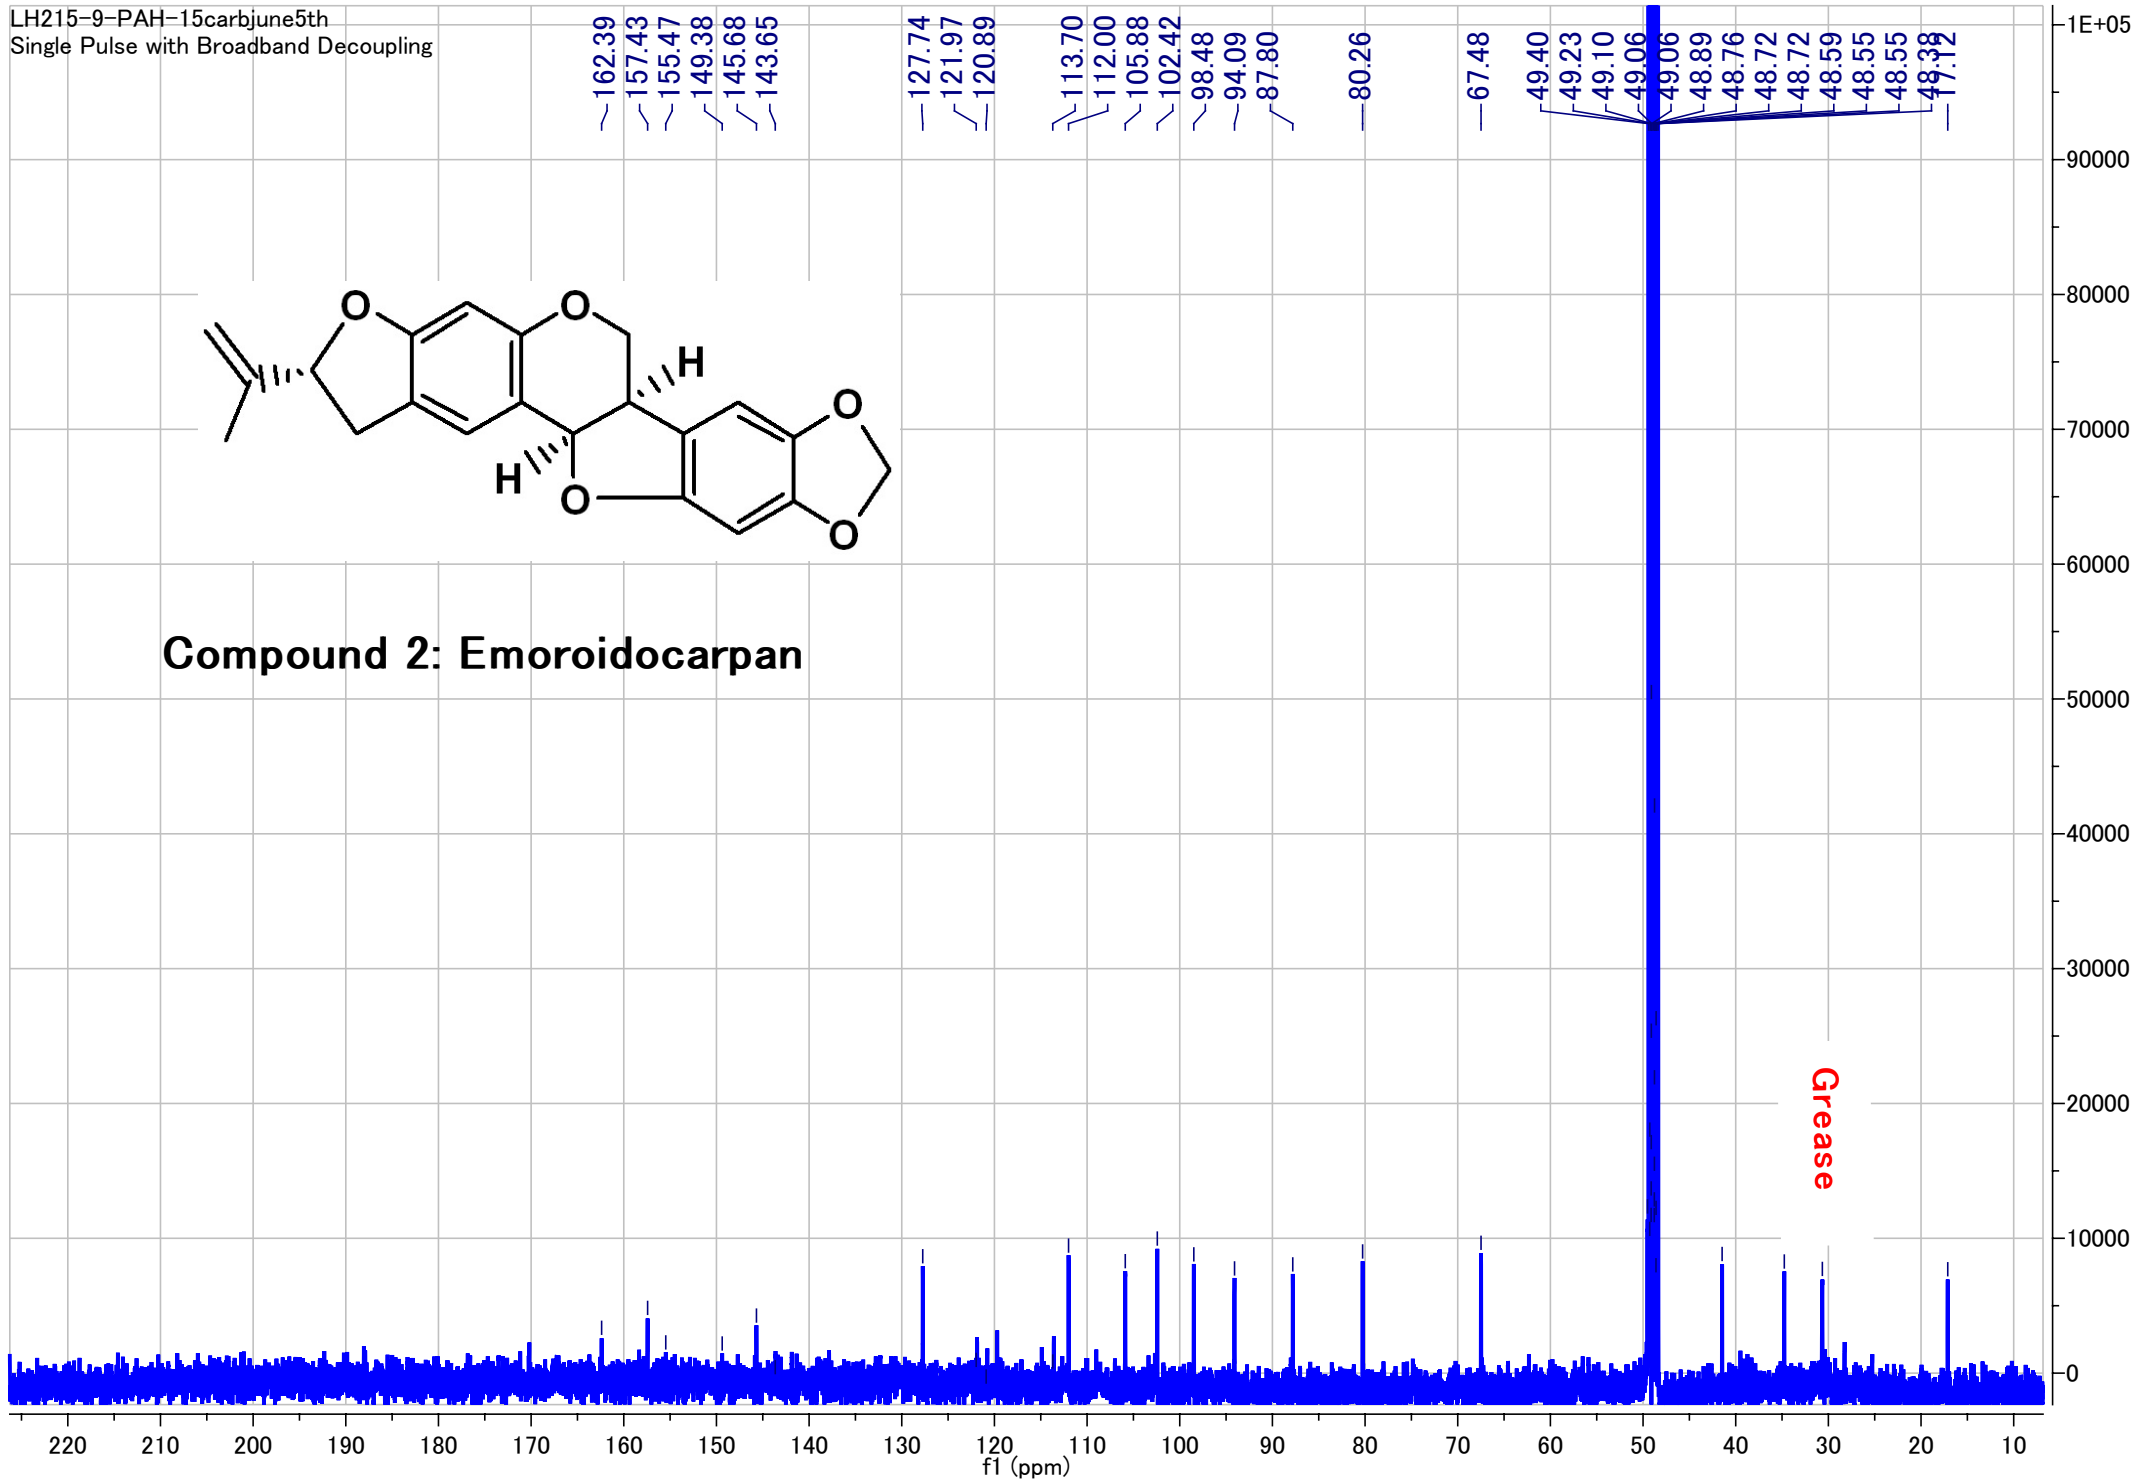

LH2158-PAH14july16  
Single Pulse Experiment

# <sup>1</sup>H-NMR (in CDCl<sub>3</sub>)

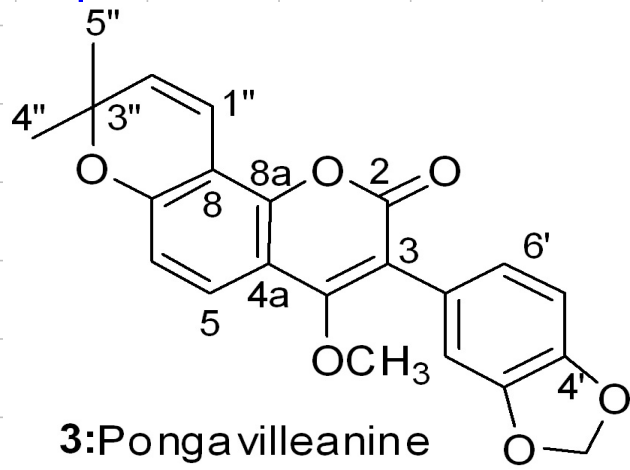

3:Pongavilleanine

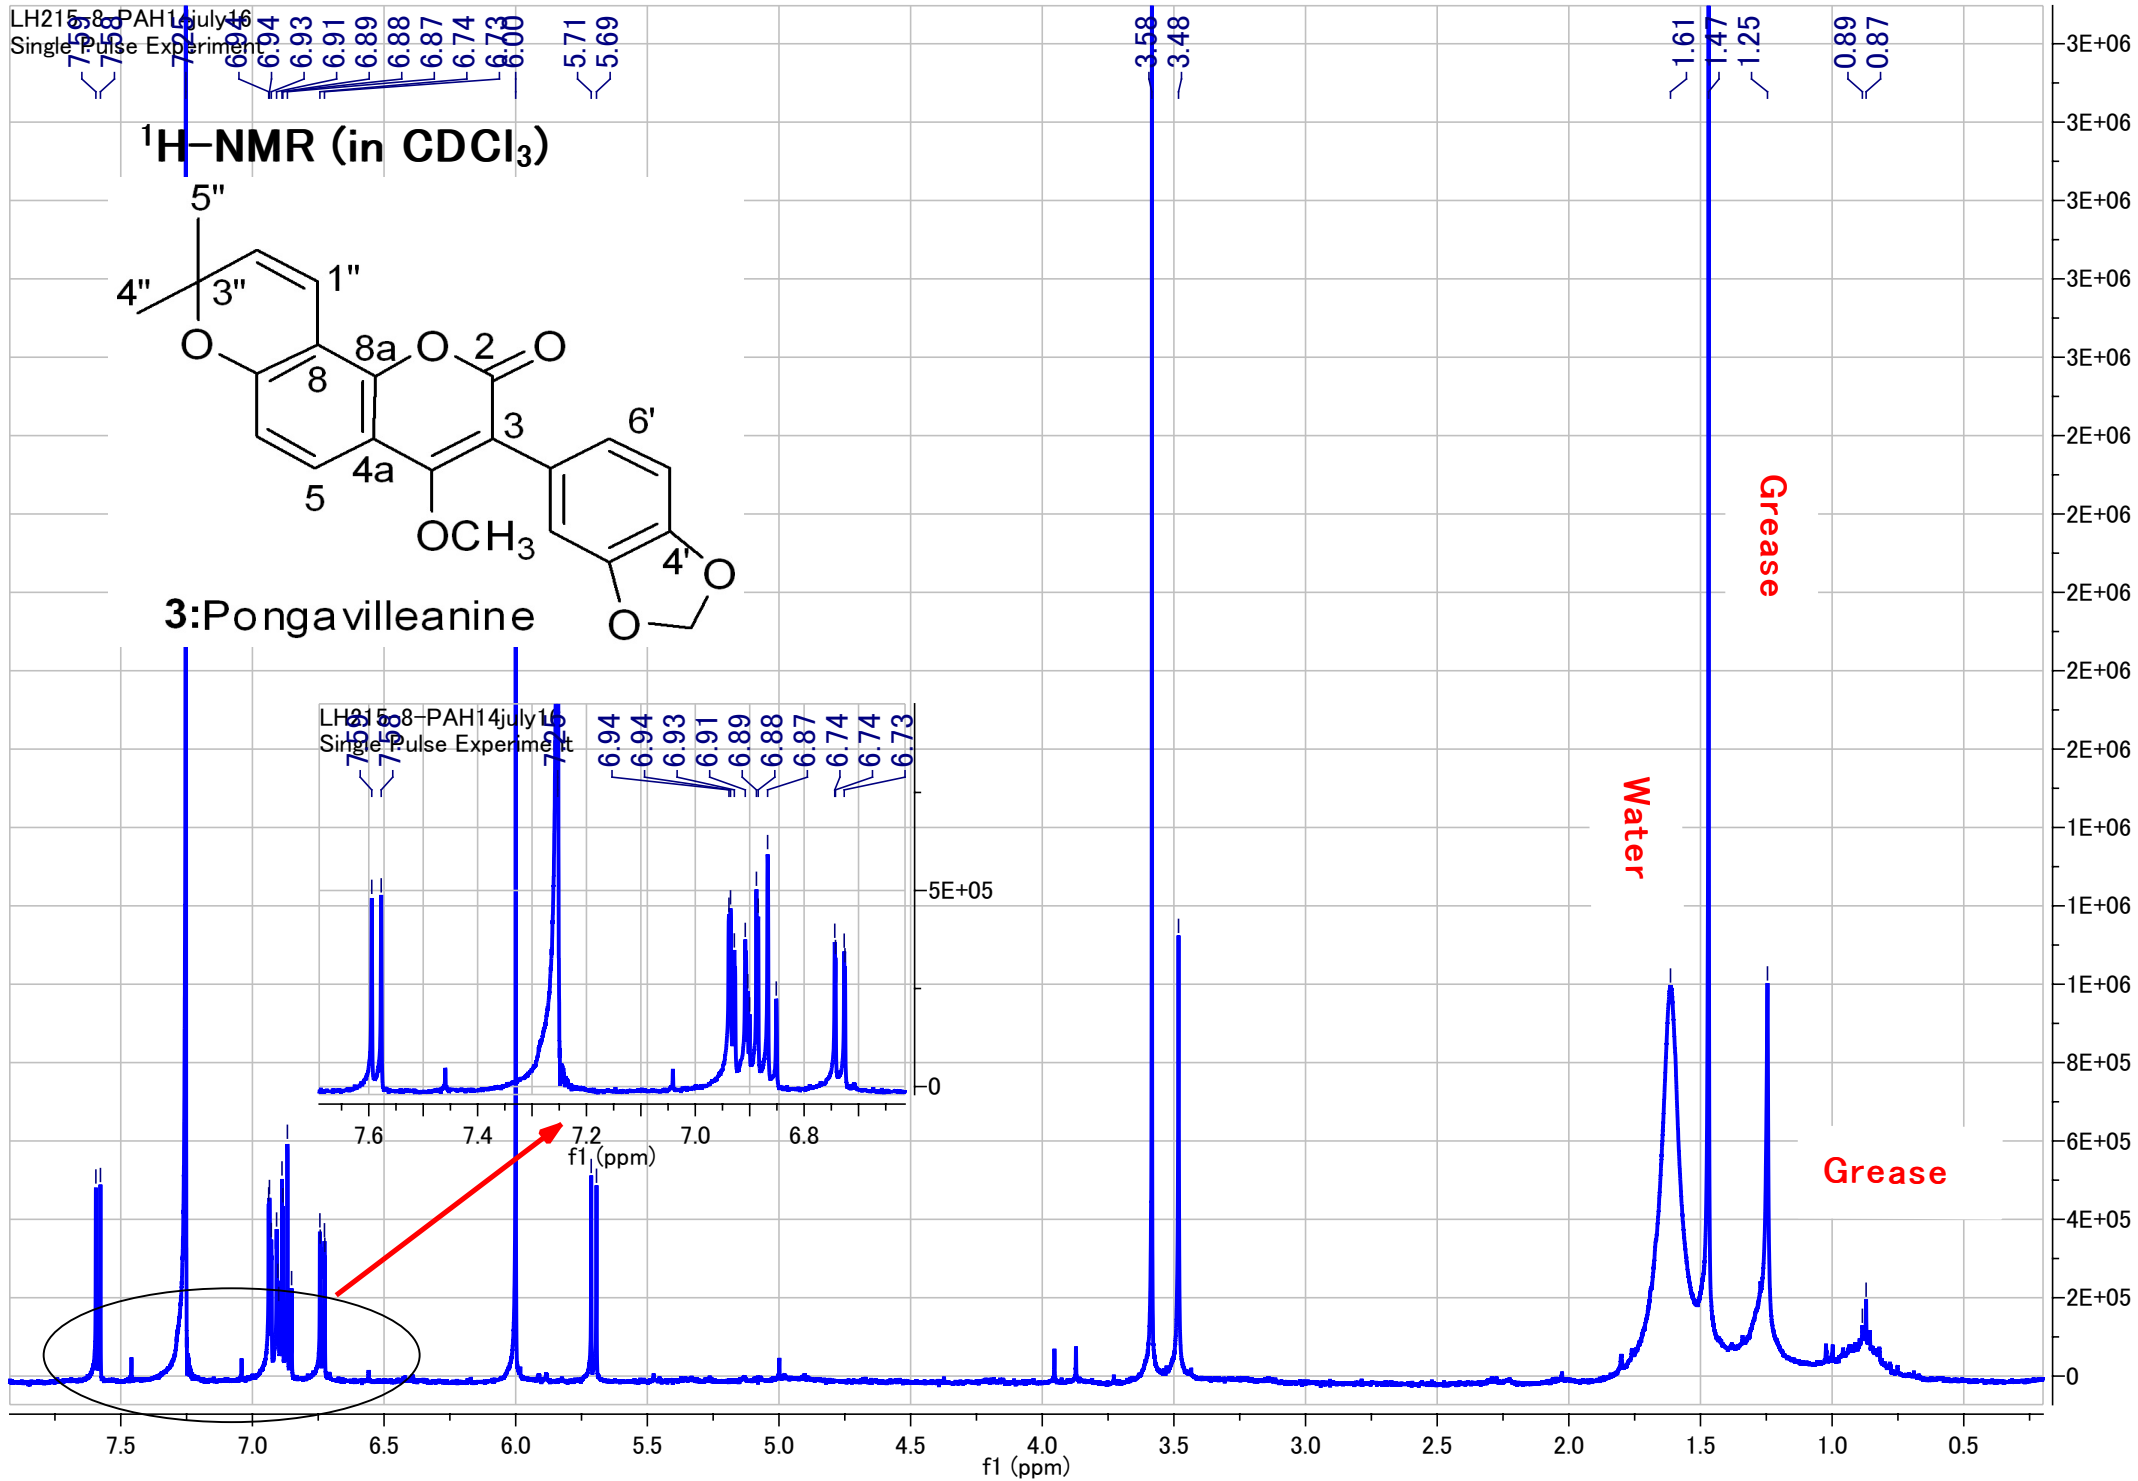

LH2158-PAH14july16  
Single Pulse Experiment

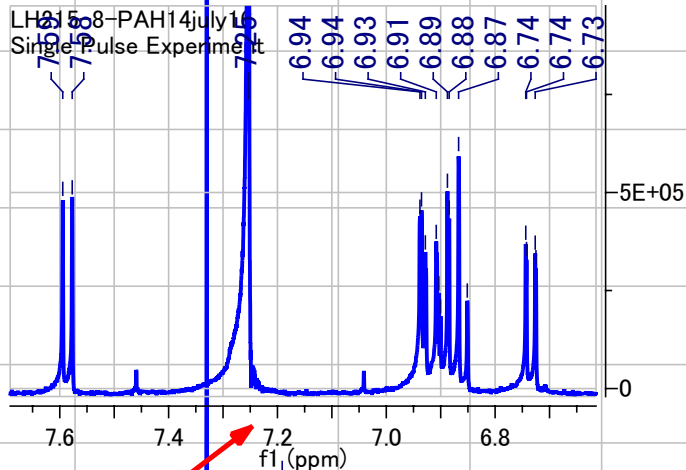

Grease

Water

Grease

LH215-8-PAH14 July 16 carb  
Single pulse with broadband decoupling

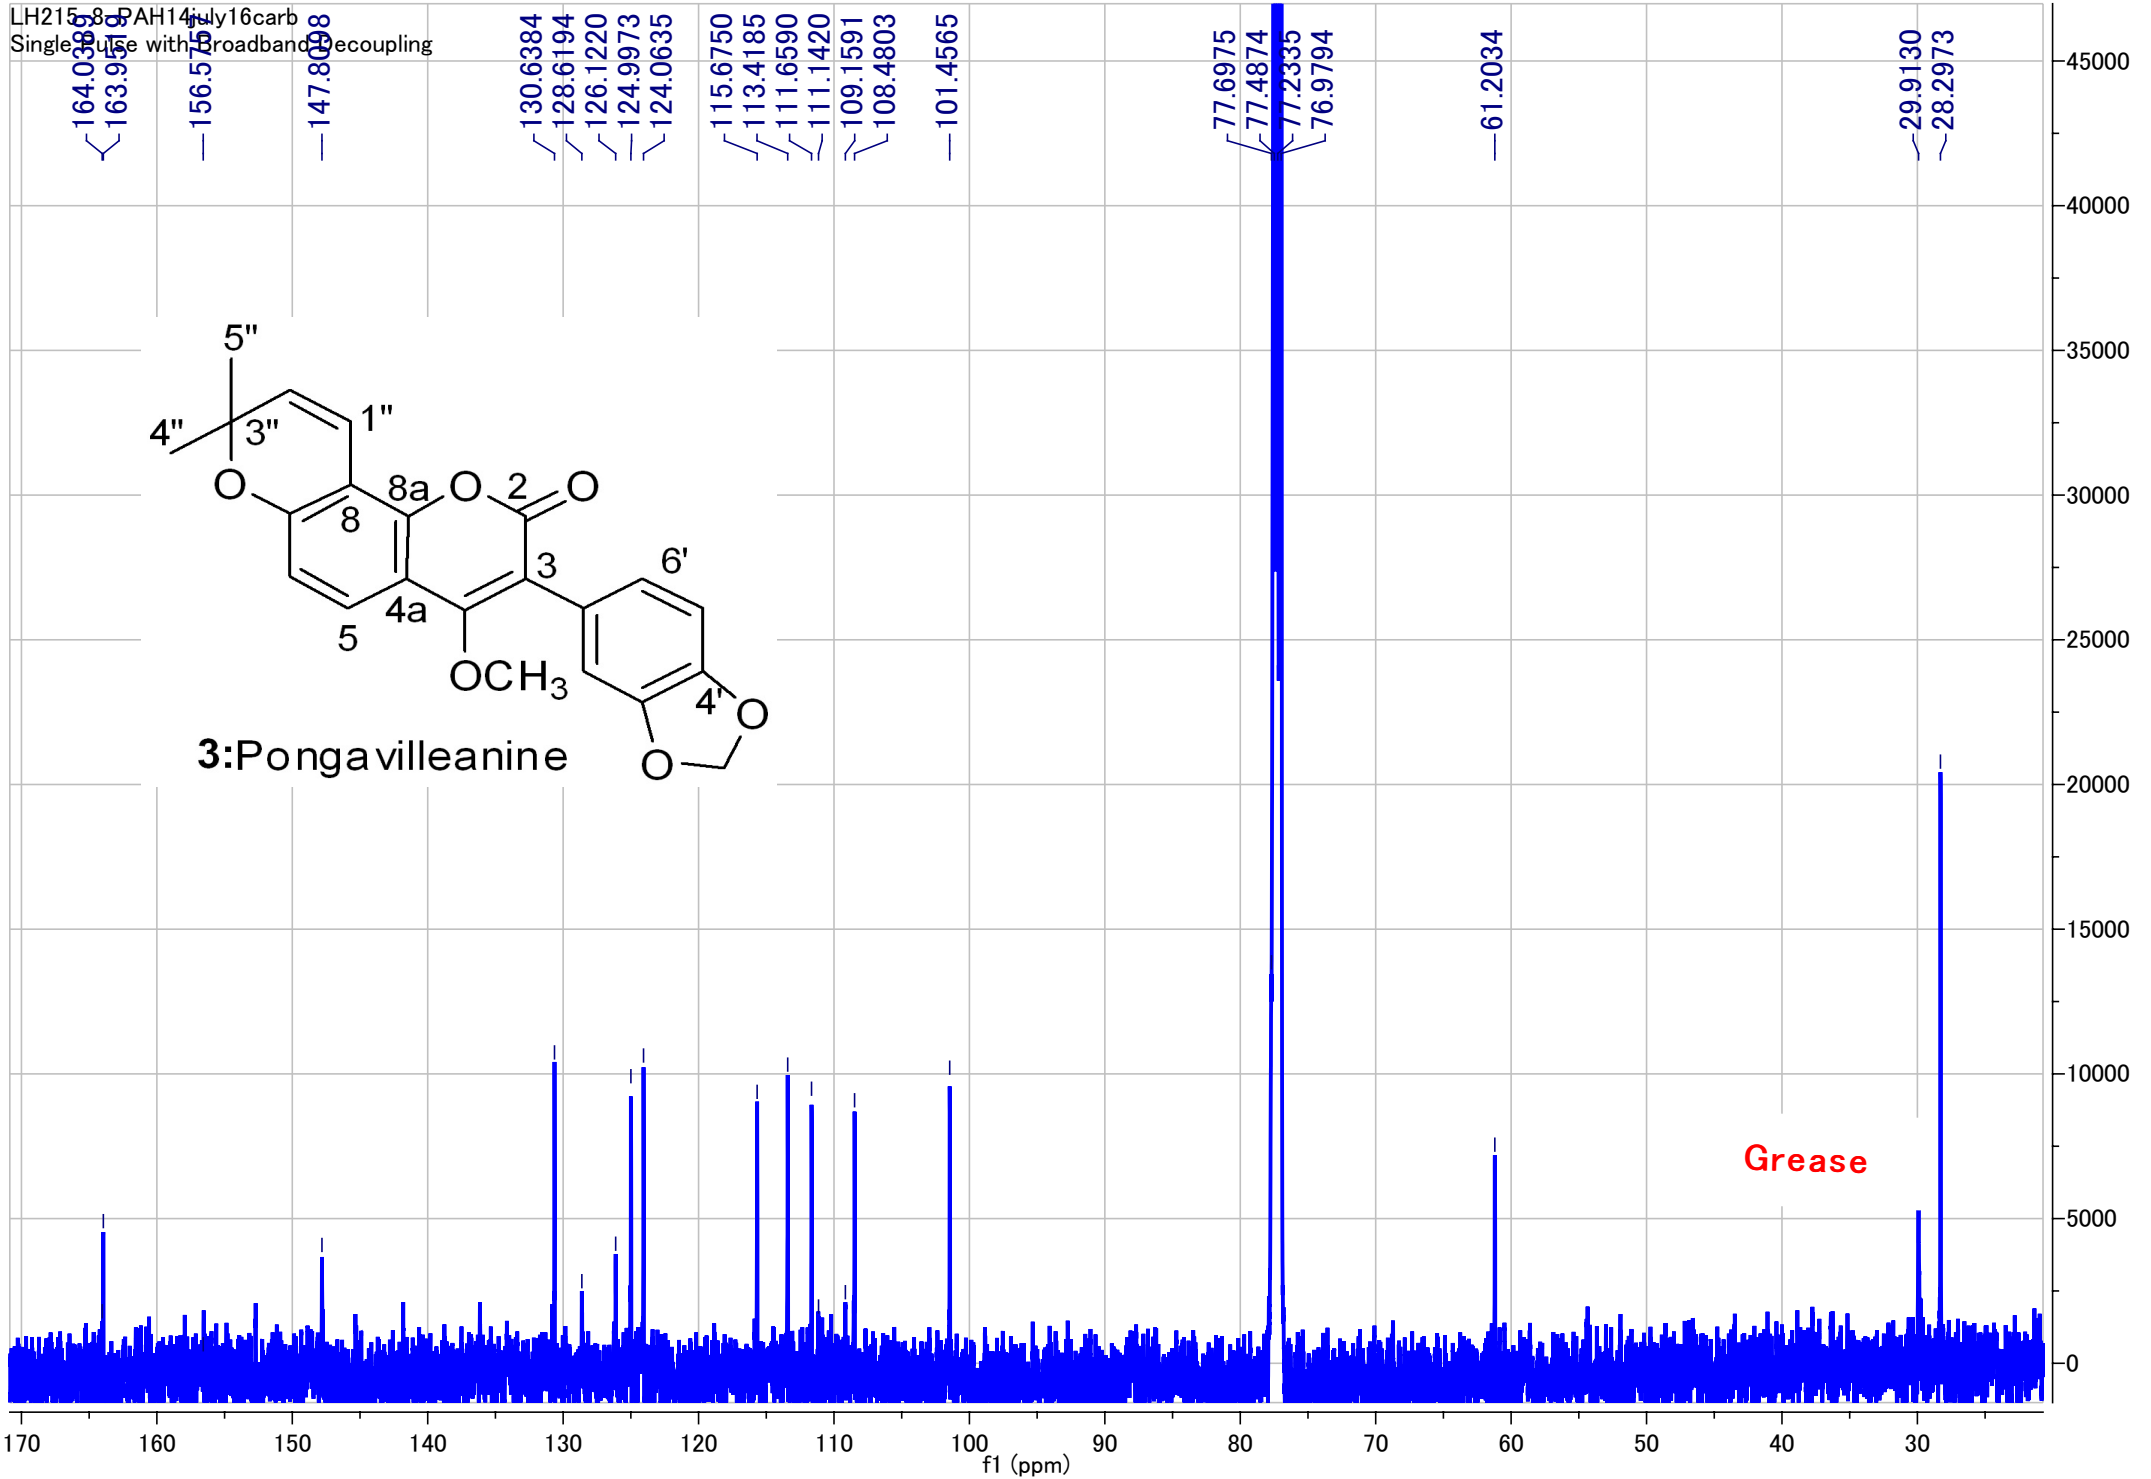



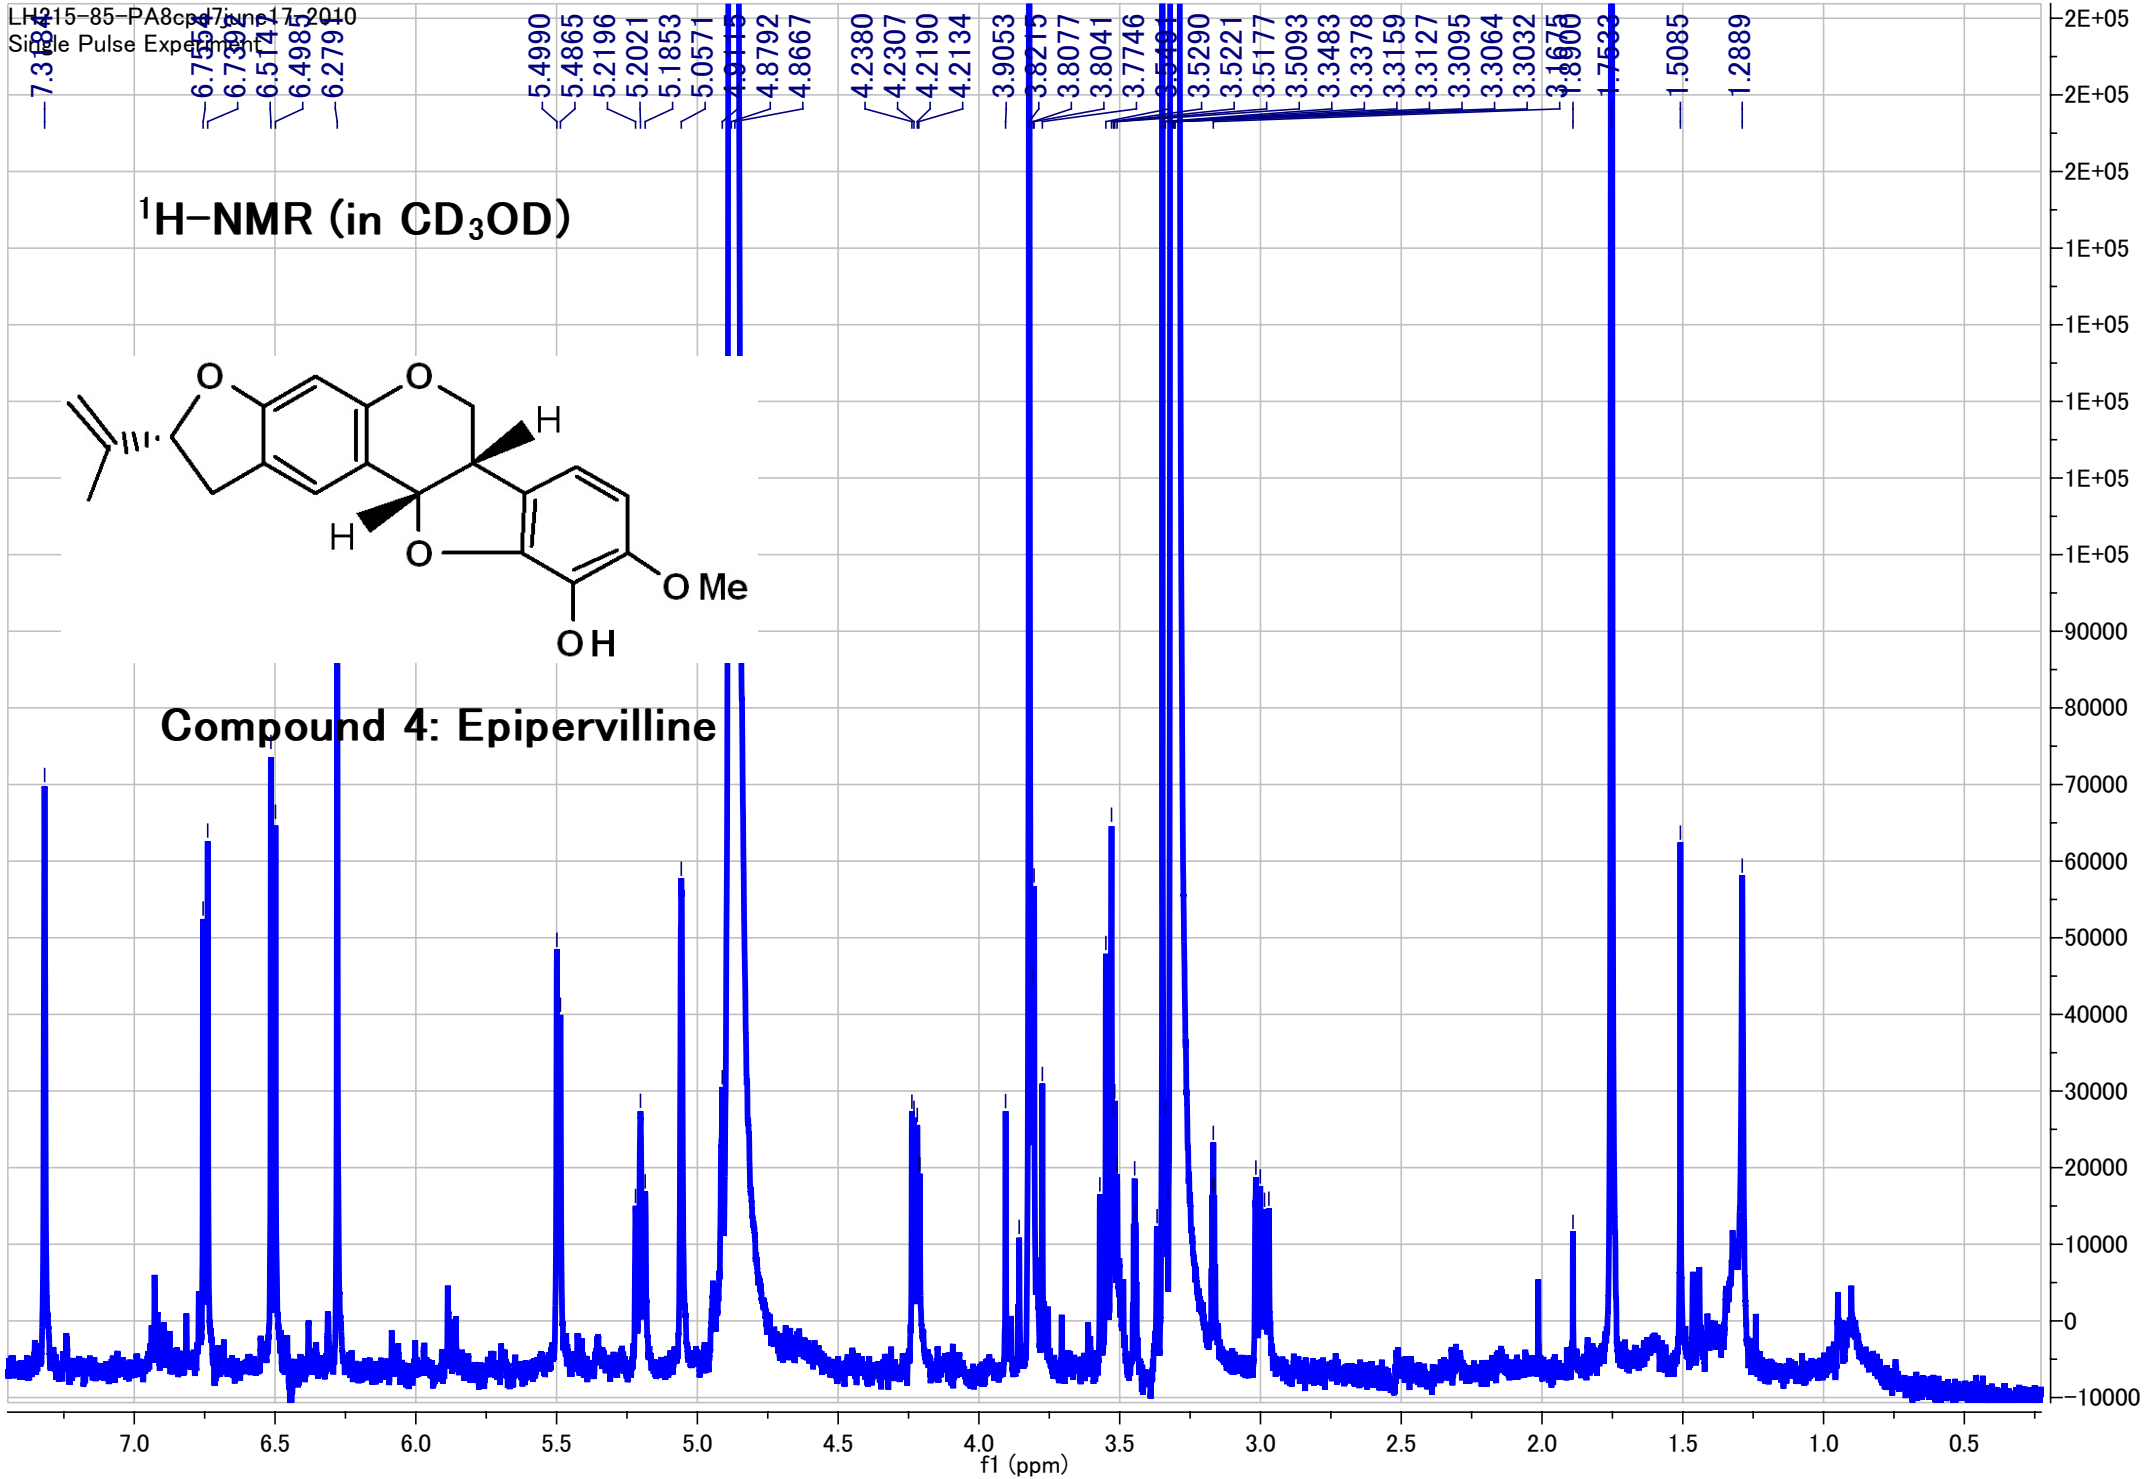

LH215-8-PAH-215-11caerbjun29  
Epipervilline  
Single Pulse with Broadband Decoupling

# <sup>13</sup>C-NMR

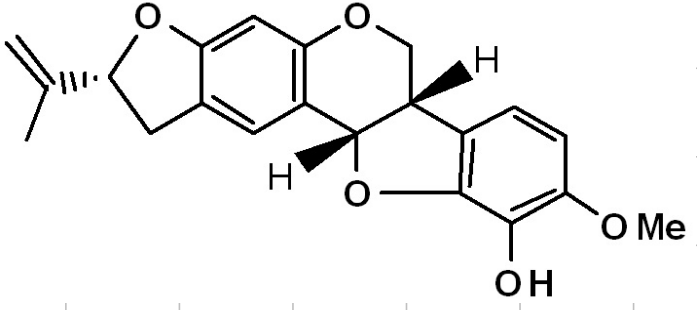

Compound 4: Epipervilline

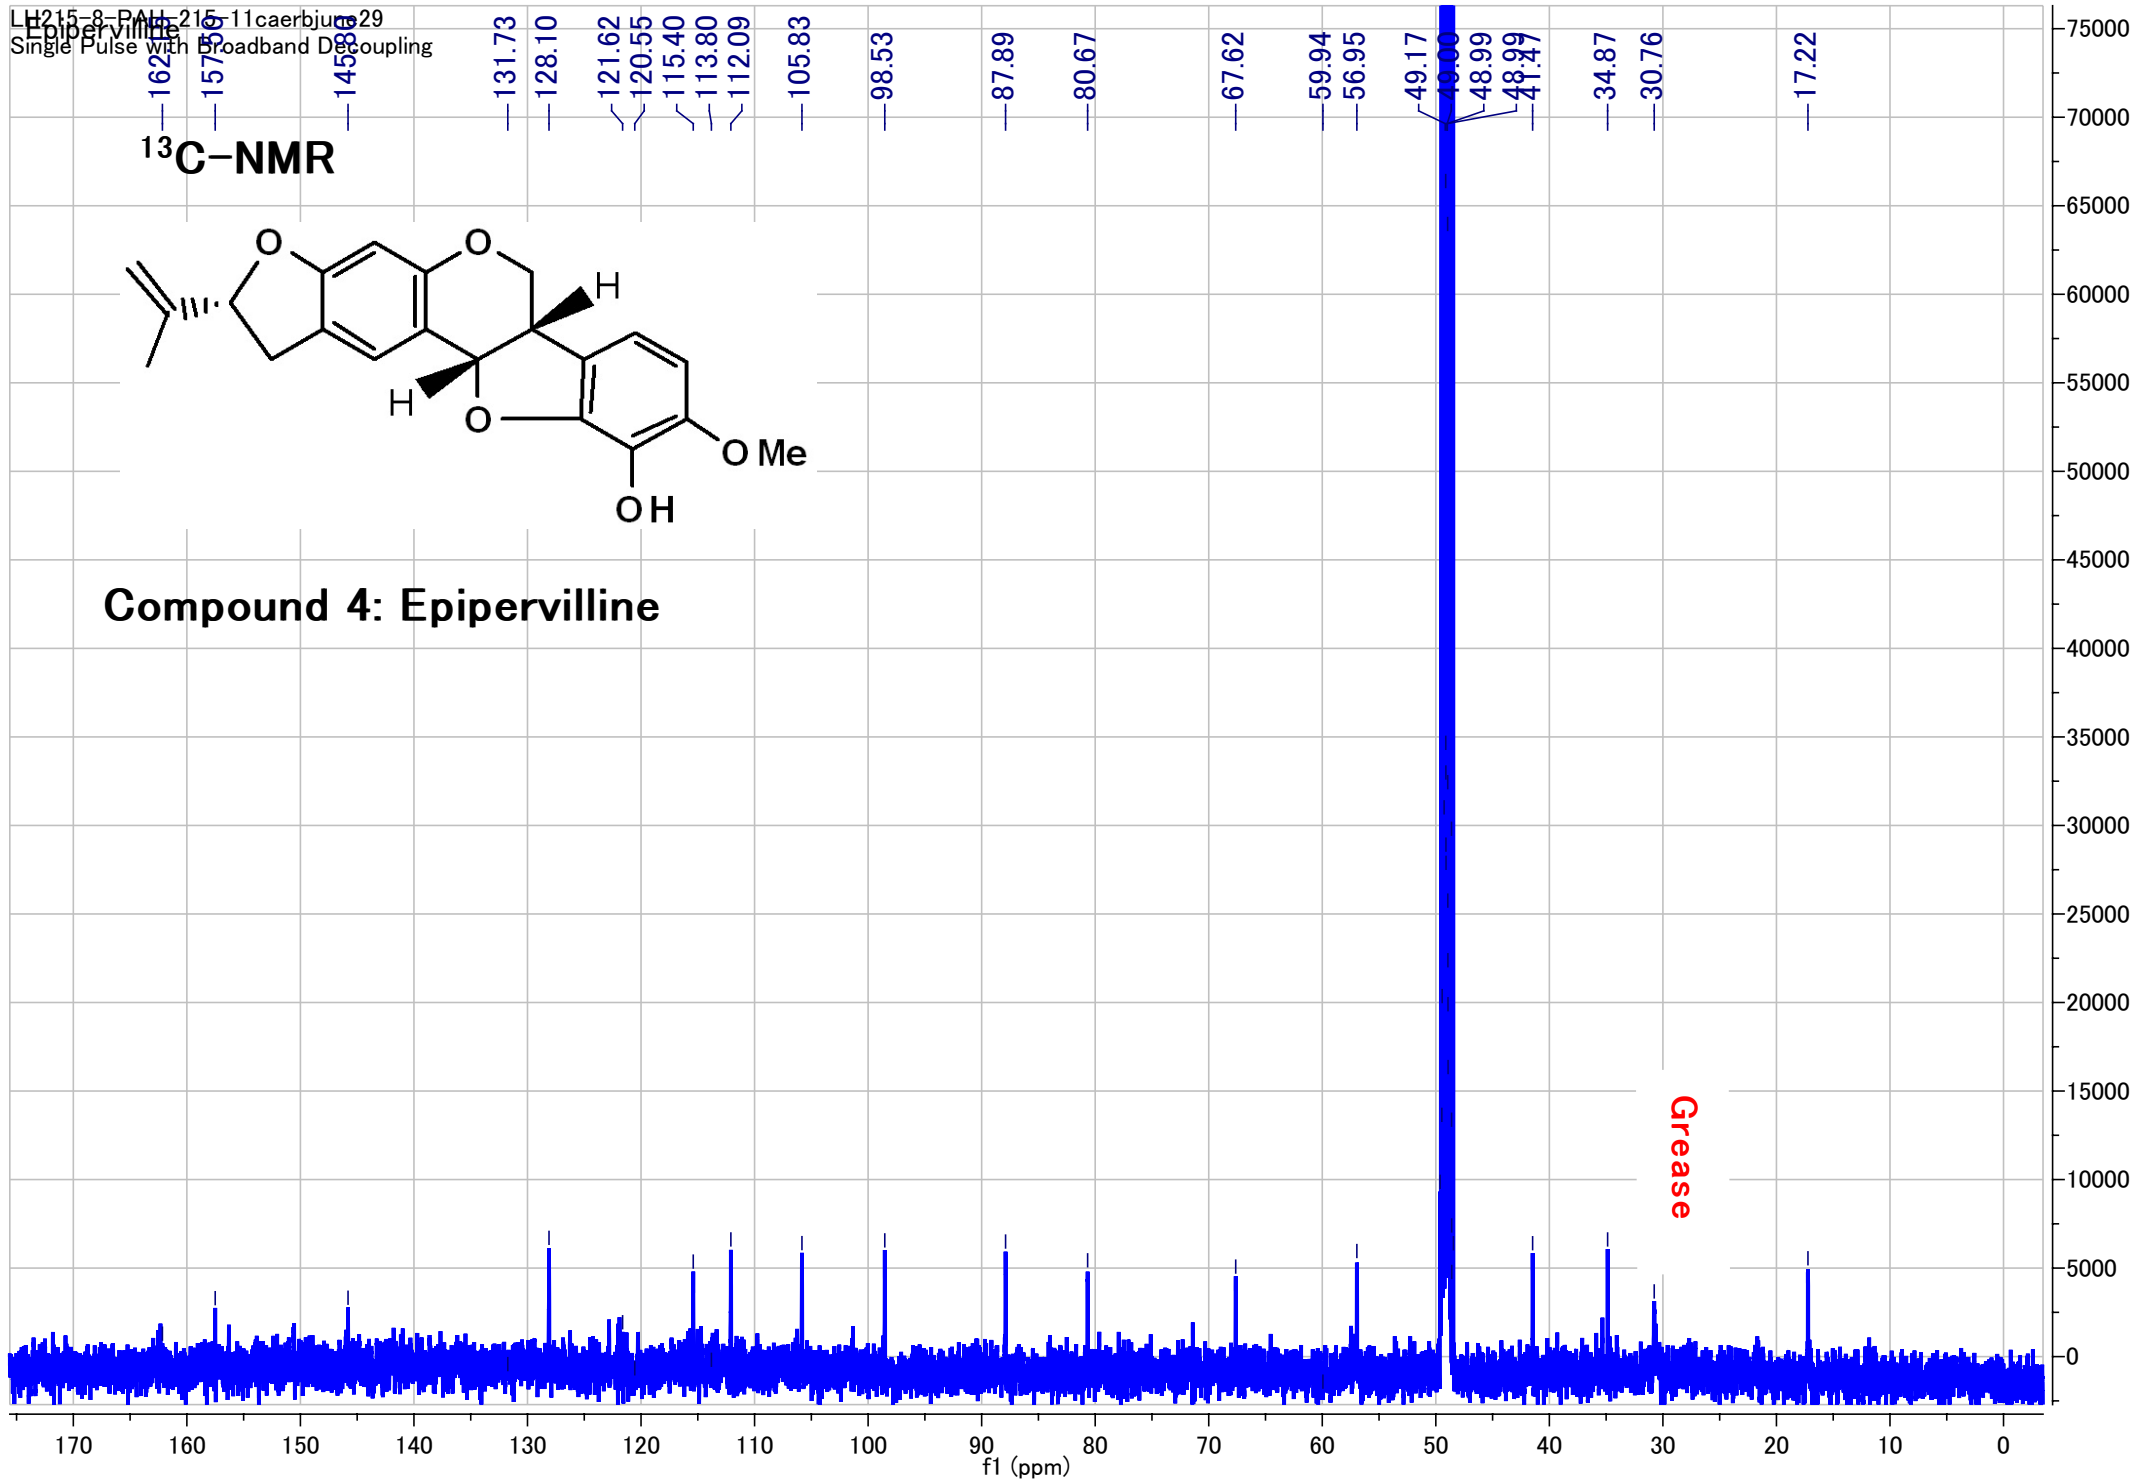

LH215 Epirotenolone  
Single Pulse Experiment

# <sup>1</sup>H-NMR (in CD<sub>3</sub>OD)

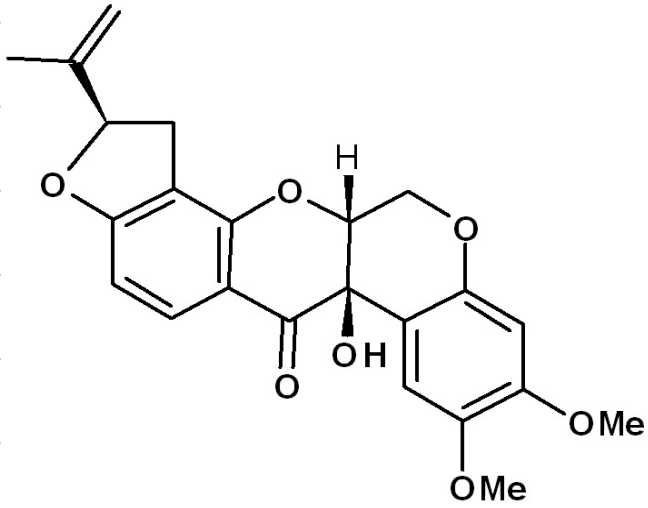

## Compound 5: Rotenolone

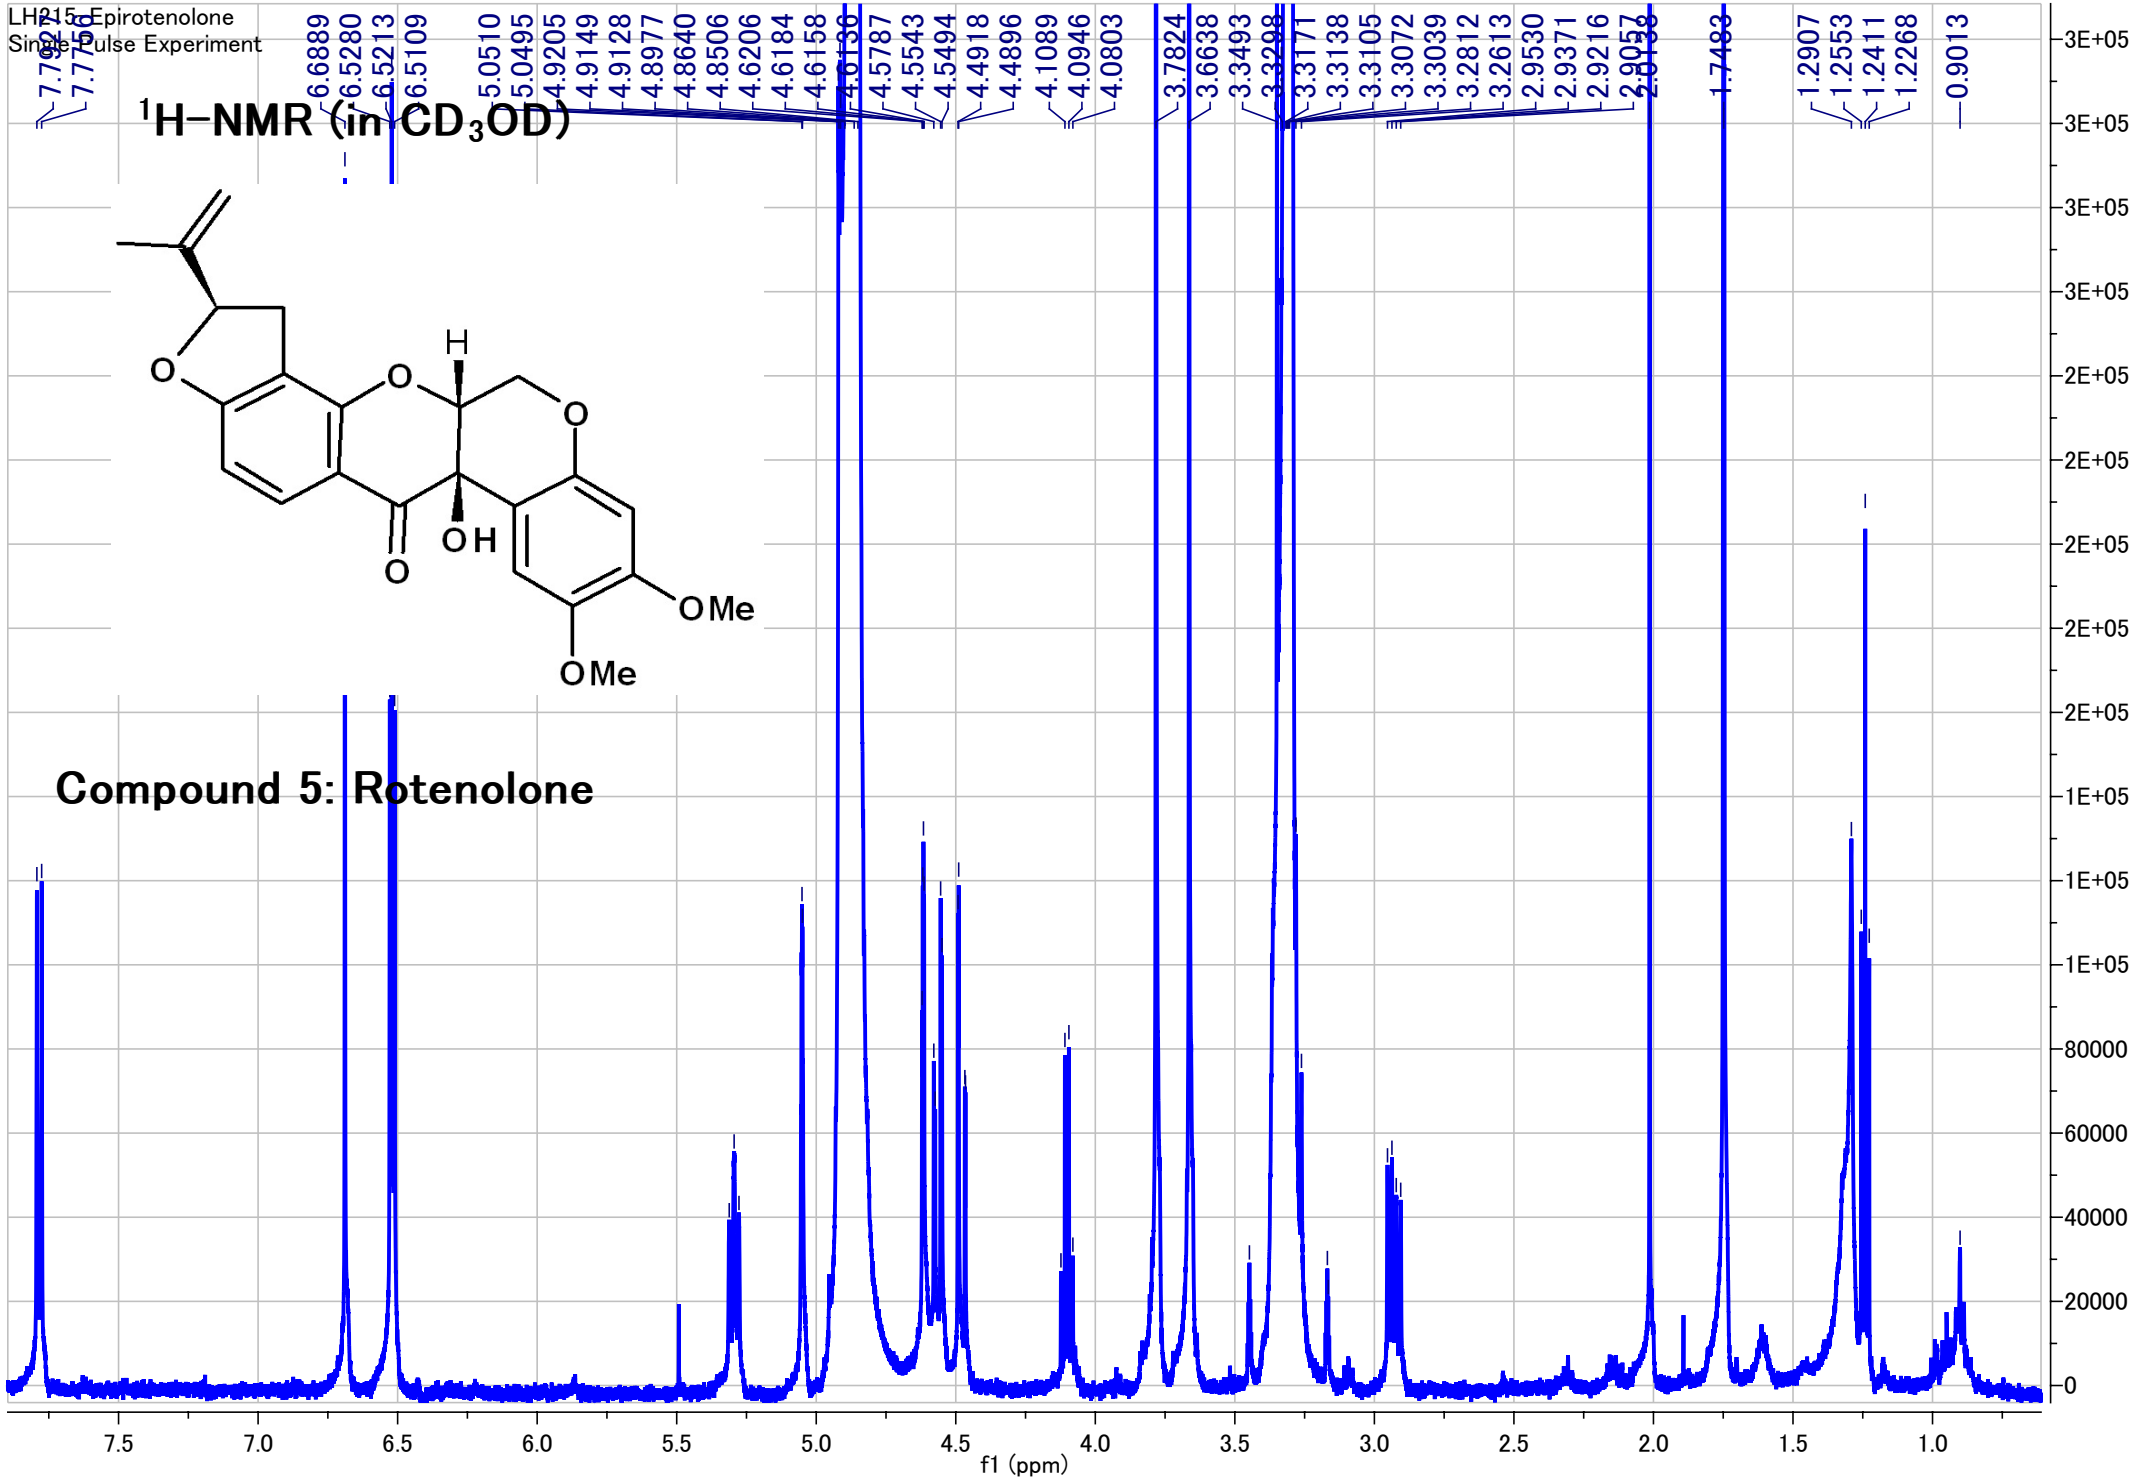

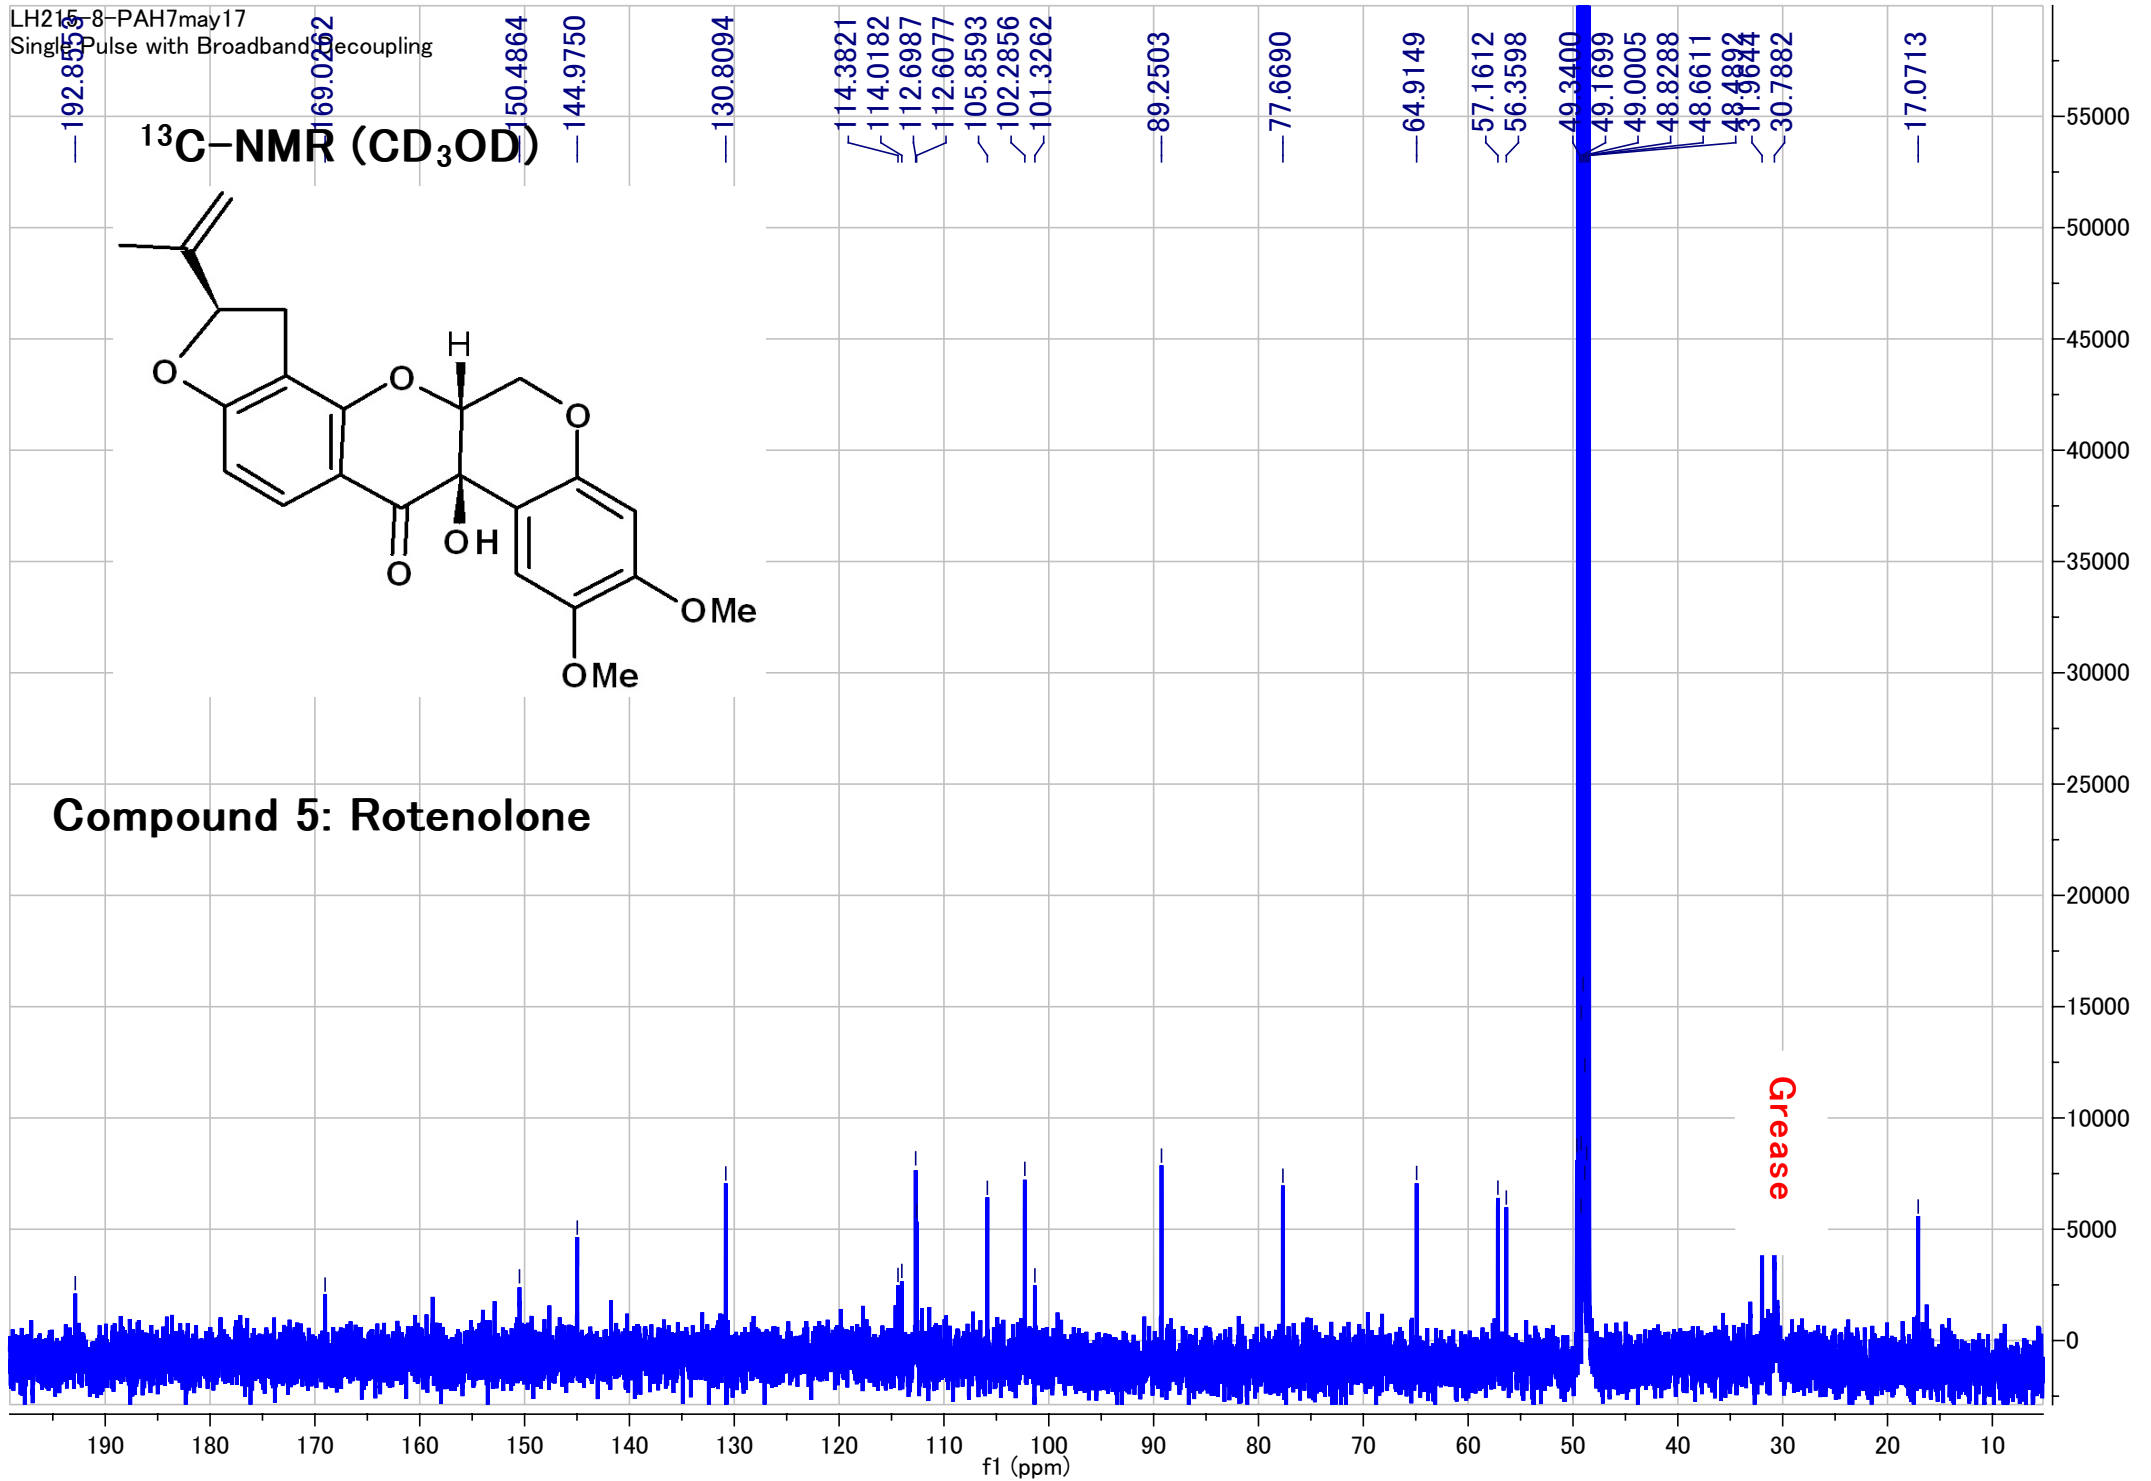

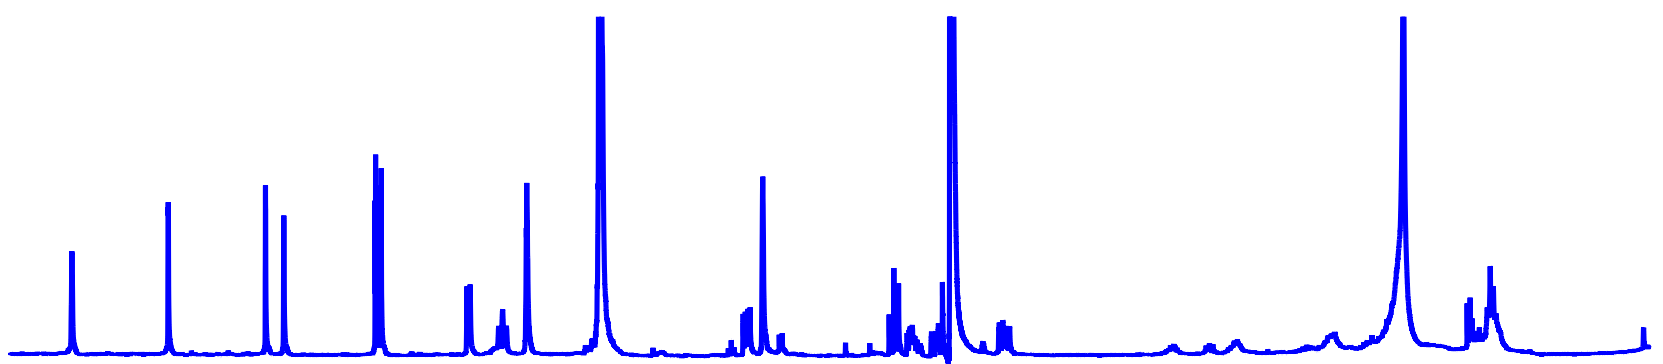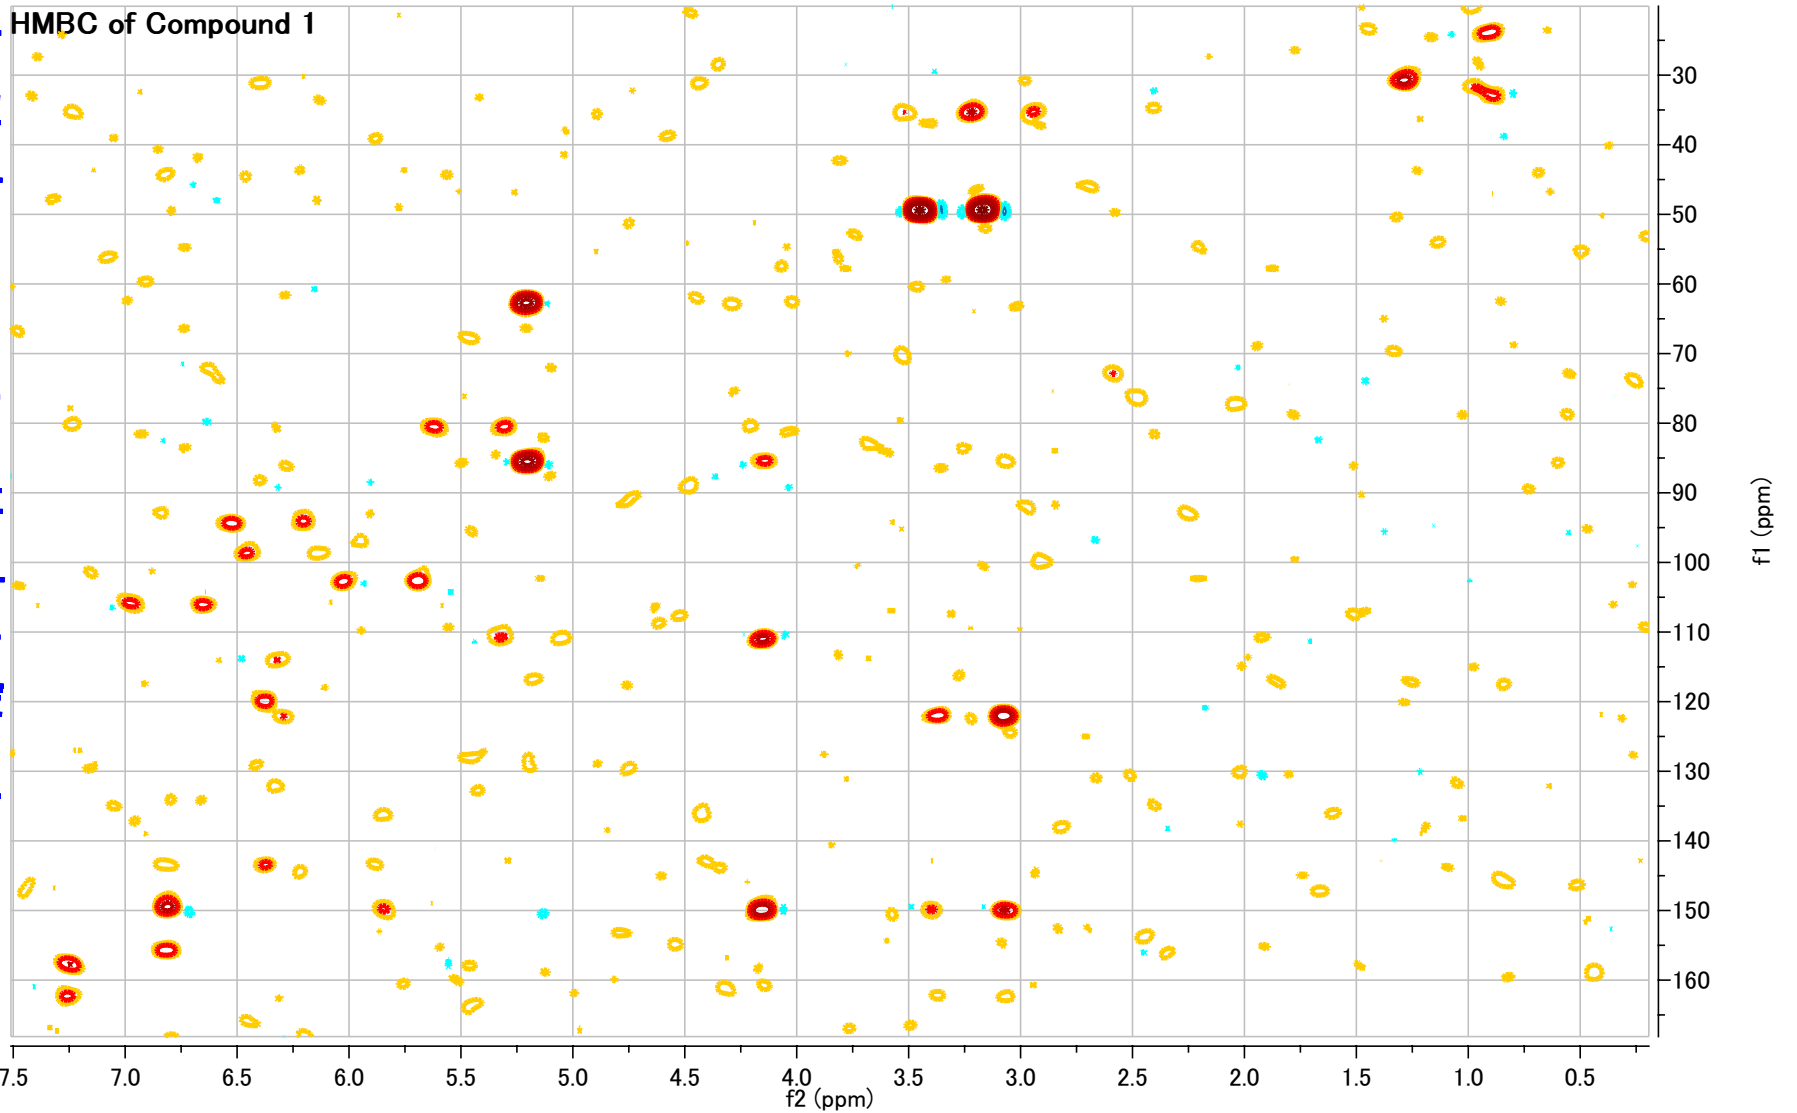

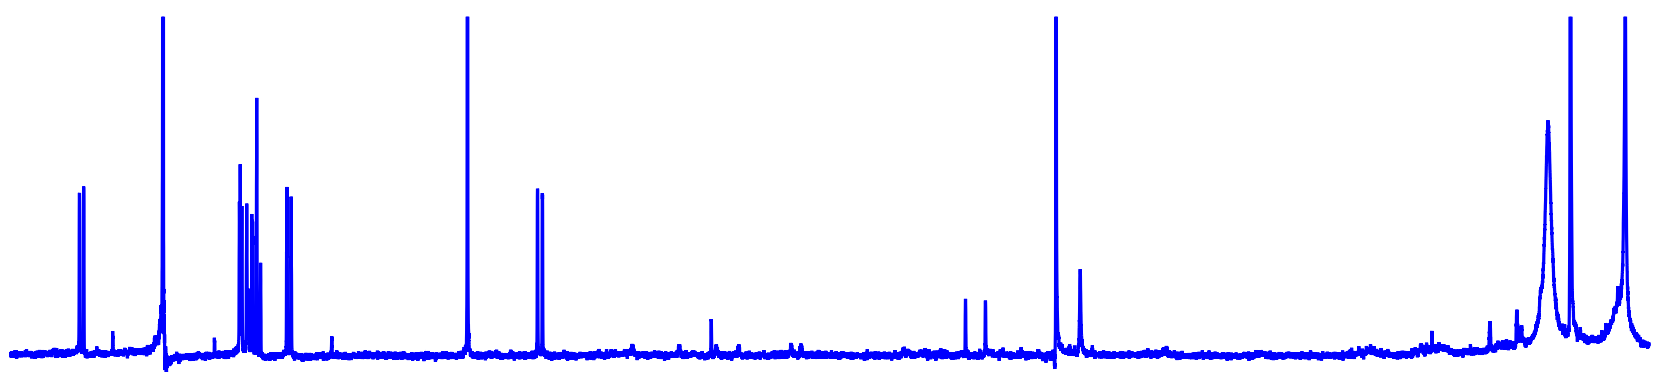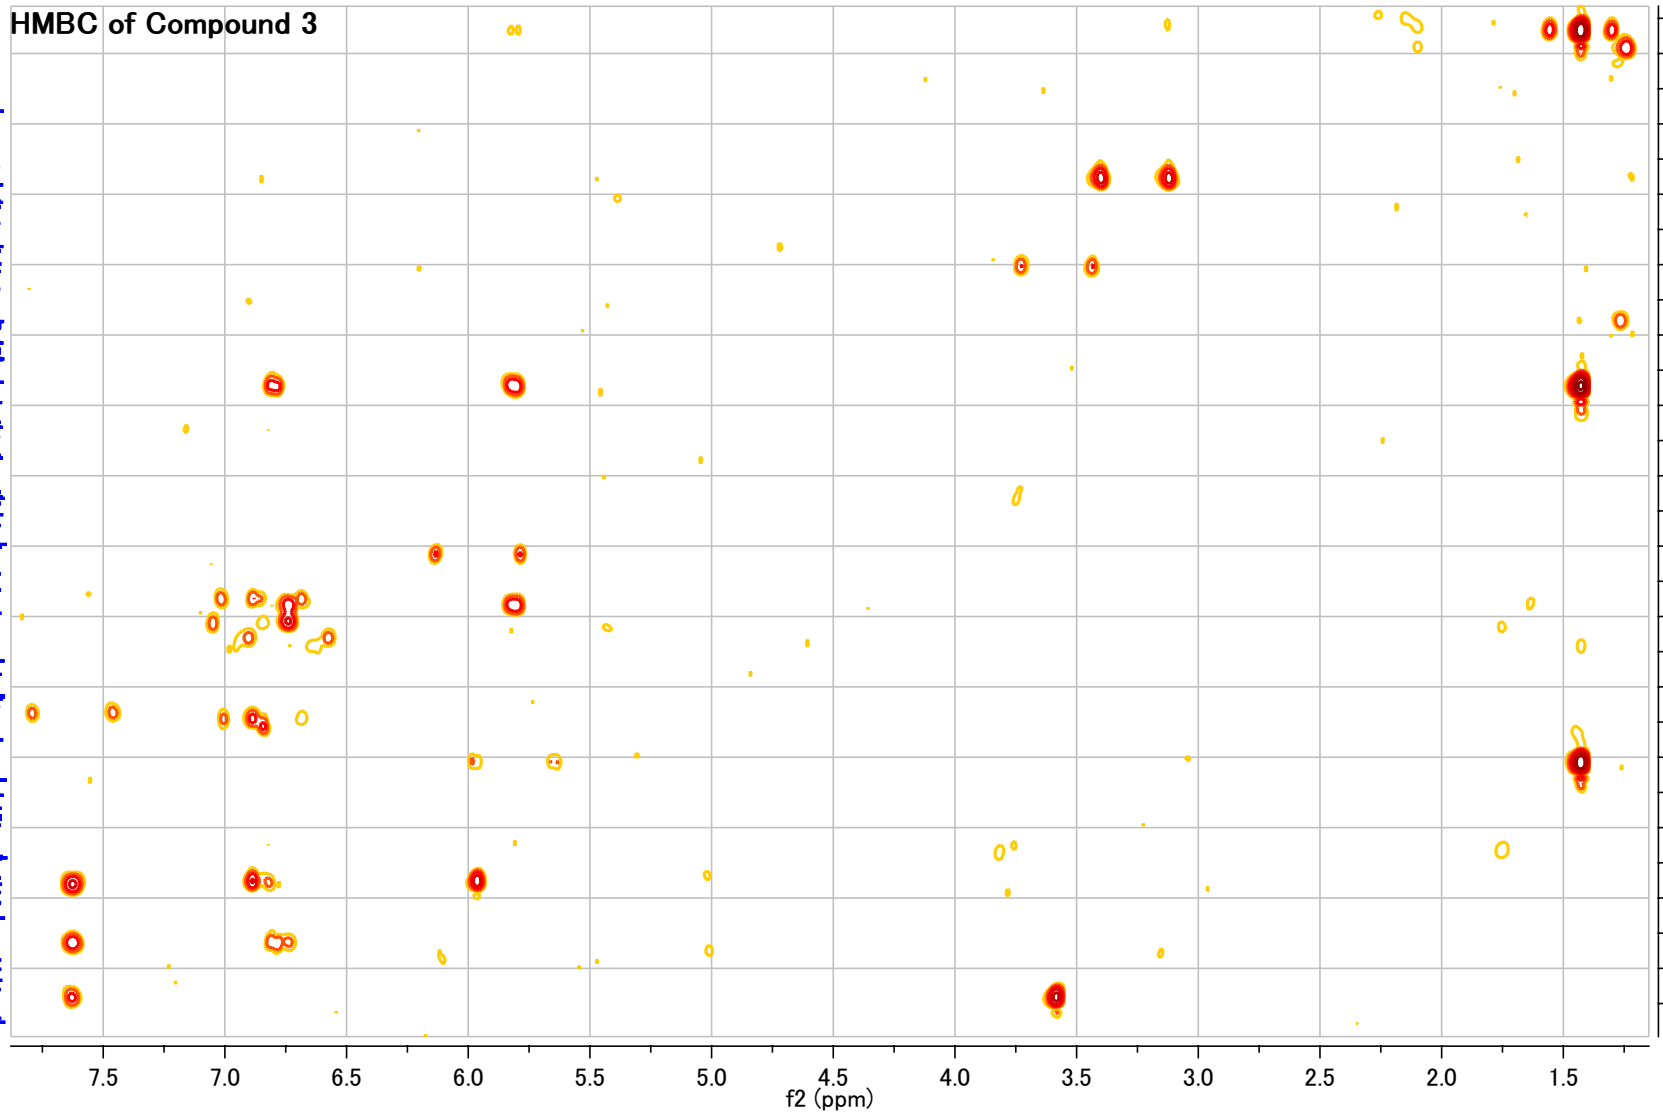

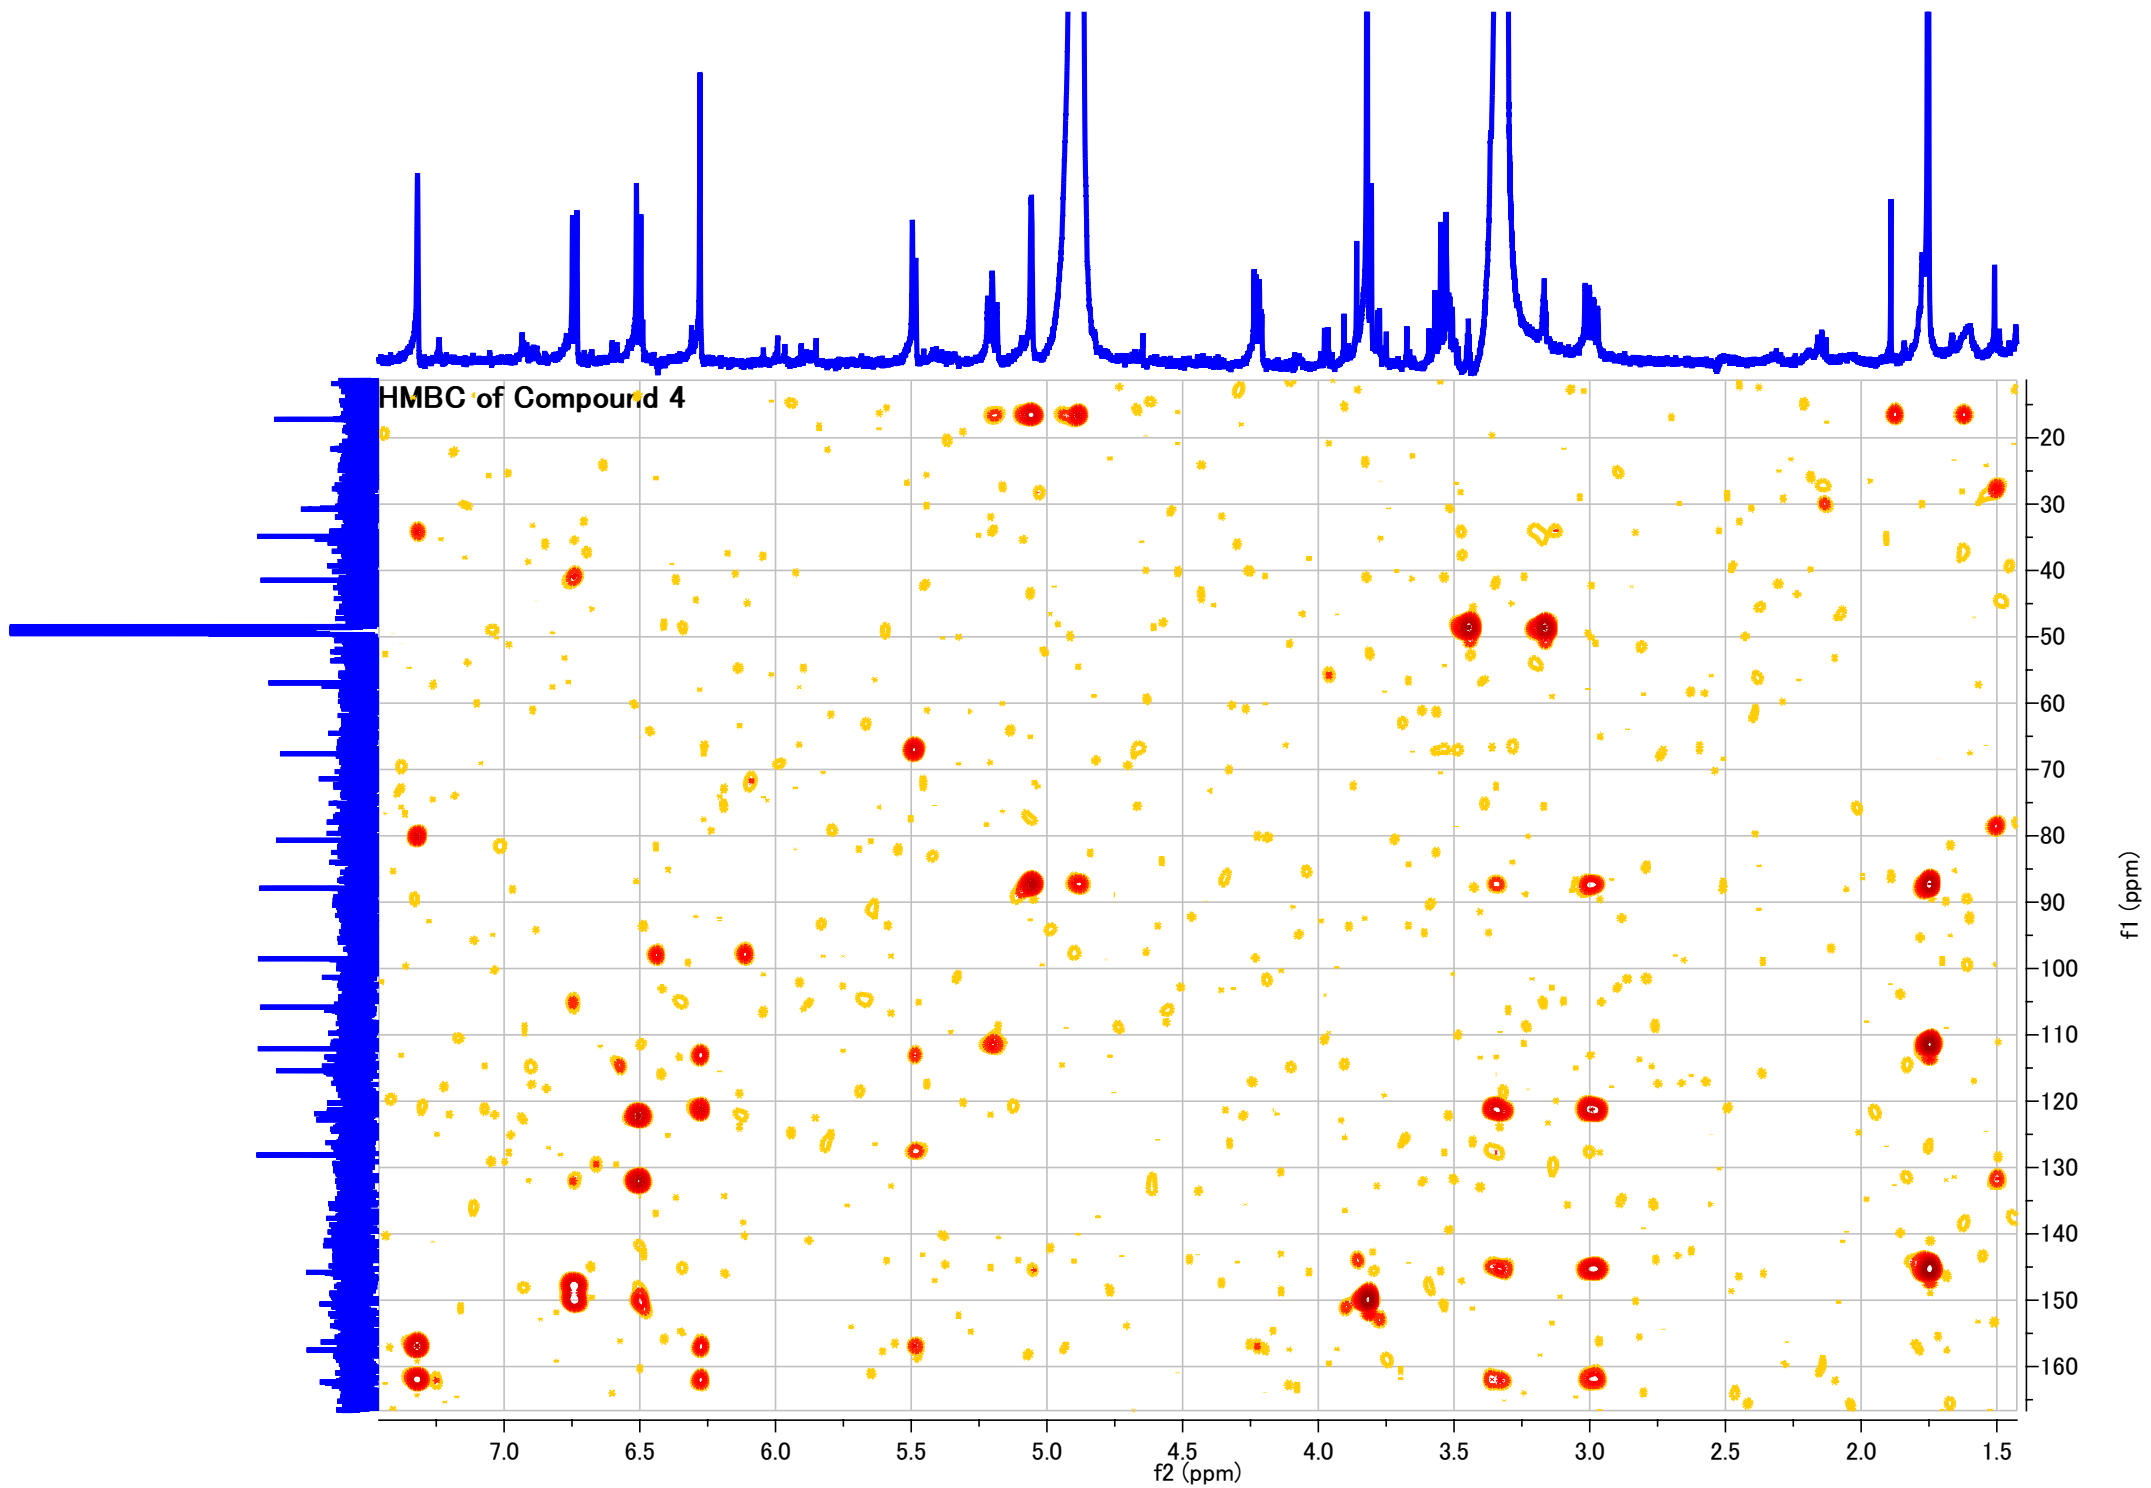

Supplement: NIHMS232637-supplement-Supporting_Information.pdf [file NIHMS232637-supplement-Supporting_Information.pdf]
